# Supplementary material for: Condom use and HIV testing among adults in Switzerland: repeated national cross-sectional surveys 2007, 2012, and 2017
Source: bioRxiv or medRxiv preprint supplement (doi:10.1101/2022.12.05.22283096), 2022-12-06
Supplement: Supplementary file [file media-1.pdf]

## Online supplement

### Condom use and HIV testing among adults in Switzerland: repeated national cross-sectional surveys 2007, 2012, and 2017

Diana Buitrago-Garcia, Georgia Salanti, Nicola Low

Institute of Social and Preventive Medicine, University of Bern, Bern, Switzerland

# Table of Contents

Table S1. Swiss Health Survey filtering questions to determine eligible respondents to questions about condom use at last intercourse and HIV testing, according to survey year. .... 3

Table S2. Type of partner in men and women reporting any same-sex partner 2007, 2012, 2017..... 3

Table S3. Condom use at last sexual intercourse, men and women with only opposite-sex partners. Denominators, unweighted and weighted, for each survey and variable..... 4

Table S4. Condom use, men and women reporting only opposite-sex partners, 2007. Prevalence and associations with sociodemographic factors, sexual behaviours and substance use..... 6

Table S5. Condom use at last sexual intercourse, men and women with only opposite-sex partners, 2012 and 2017. Univariable logistic regression..... 8

Table S6. Condom use at last sexual intercourse, men and women with any same-sex partners. Denominators, unweighted and weighted, and number of missing values for each survey and variable ..... 10

Table S7. Condom use, men reporting any same-sex partner. Associations with sociodemographic factors, sexual behaviours and substance use from univariable logistic regression, 2007, 2012, 2017 and from multivariable logistic regression, 2007. .... 12

Table S8. Condom use, women reporting any same-sex partner. Associations with sociodemographic factors, sexual behaviours and substance use from univariable logistic regression, 2007, 2012, 2017 and from multivariable logistic regression 2007 and multivariable logistic regression 2012, 2017..... 14

Table S9. Lifetime HIV testing, men and women with only opposite-sex partners. Denominators, unweighted and weighted, for each survey and variable, 2007, 2012, 2017 ..... 16

Table S10. Lifetime HIV testing, men and women with only opposite-sex partners. Univariable logistic regression, 2012 and 2017 ..... 18

Table S11. HIV testing in the last 12 months, men and women reporting only opposite-sex partners and men reporting any same-sex partner 2012, 2017. .... 19

Table S12. Lifetime HIV testing, men and women with any same-sex partners. Denominators, unweighted and weighted, and number of missing values for each survey and variable, 2007, 2012, 2017 ..... 20

Table S13. Lifetime HIV testing, men reporting any same-sex partner. Associations with sociodemographic factors, sexual behaviours and substance use from univariable logistic regression, 2007, 2012, 2017 ..... 22

Table S14. Lifetime HIV testing, women reporting any same-sex partner. Associations with sociodemographic factors, sexual behaviours and substance use from univariable logistic regression, 2007, 2012, 2017 ..... 23

Table S1. Swiss Health Survey filtering questions to determine eligible respondents to questions about condom use at last intercourse and HIV testing, according to survey year.

| Year | Criteria to determine respondents to question “Did you use a male condom the last time you had sex?”                                                                                                             |
|------|------------------------------------------------------------------------------------------------------------------------------------------------------------------------------------------------------------------|
| 2007 | a. Age between 16 and 74 years<br>b. Reported ever having had sexual intercourse<br>c. Reported ever having used a male condom                                                                                   |
| 2012 | a. Age between 16 and 74 years.<br>b. Reported ever having had sexual intercourse<br>c. Reported ever having had sex during the last 12 months                                                                   |
| 2017 | a. Age between 16 and 74 years<br>b. Reported ever having had sexual intercourse                                                                                                                                 |
|      | <b>Criteria to determine proportion of people who have had been tested for HIV in their lifetime, question “How many times have you been tested for HIV?” “When was the last time?”</b>                          |
| 2007 | a. Age between 16 and 74 years.<br>b. Blood donors: apart from donating blood the number of HIV tests done or<br>c. Non-blood donors: the number of HIV tests done.<br>d. Year and month of first and last test. |
| 2012 | a. Participants older than 16 years<br>b. Blood donors: apart from donating blood the number of HIV tests done or<br>c. Non-blood donors: the number of HIV tests done.<br>d. Year and month the last test.      |
| 2017 | a. Participants between 16 and 74 years.<br>b. Number of HIV tests done in life<br>c. Tests done within 12 months or more than 12 months ago.                                                                    |

Table S2. Type of partner in men and women reporting any same-sex partner 2007, 2012, 2017

| Sexual partners                         | 2007<br>n (%) | 2012<br>n (%) | 2017<br>n (%) |
|-----------------------------------------|---------------|---------------|---------------|
| <b>Men</b>                              |               |               |               |
| <b>Total</b>                            | 204 (32)      | 246(39)       | 183 (29)      |
| Mainly with women, but at least one man | 94 (36)       | 117 (46)      | 47 (18)       |
| As many women as men                    | 20 (37)       | 23 (43)       | 11 (20)       |
| Mainly men but, at least one woman      | 43 (44)       | 43 (44)       | 12 (12)       |
| Only with men                           | 47 (21)       | 63 (28)       | 113 (51)      |
| <b>Women</b>                            |               |               |               |
| <b>Total</b>                            | 227 (32)      | 300 (43)      | 172 (25)      |
| Mainly with men, but at least one woman | 173 (34)      | 250(48)       | 92 (18)       |
| As many men as woman                    | 22 (51)       | 17 (40)       | 4 (9)         |
| Mainly women but, at least one man      | 25 (45)       | 23 (41)       | 8 (14)        |
| Only with women                         | 7 (8)         | 10 (12)       | 68 (80)       |

Table S3. Condom use at last sexual intercourse, men and women with only opposite-sex partners. Denominators, unweighted and weighted, for each survey and variable

|                                                   | Men<br>2007   | Men<br>2012   | Men<br>2017   | Women<br>2007 | Women<br>2012 | Women<br>2017 |
|---------------------------------------------------|---------------|---------------|---------------|---------------|---------------|---------------|
| <b>Totals, N unweighted, weighted<sup>a</sup></b> | 5415, 1972621 | 7382, 2427588 | 8049, 2724669 | 5851,1830947  | 7025, 2132003 | 8428, 2557958 |
| <b>Age, years</b>                                 |               |               |               |               |               |               |
| 16-24                                             | 546, 292091   | 966, 295120   | 903, 301043   | 517, 246538   | 851, 255515   | 876, 258899   |
| 25-34                                             | 952, 382973   | 1,064, 454261 | 1111, 528079  | 1140, 384853  | 1130, 419164  | 1291, 505920  |
| 35-44                                             | 1448, 478905  | 1,470, 488511 | 1448, 530176  | 1610, 464059  | 1571, 471335  | 1625, 509388  |
| 45-54                                             | 1038, 379974  | 1,705, 550479 | 1864, 573081  | 1107, 361793  | 1784, 504578  | 1960, 558324  |
| 55-64                                             | 874, 275281   | 1,267, 390680 | 1520, 465839  | 947, 253357   | 1086, 307860  | 1604, 434936  |
| 65-74                                             | 557, 163398   | 910, 248536   | 1203, 326452  | 530, 120346   | 603, 173550   | 1072, 290492  |
| <b>Region</b>                                     |               |               |               |               |               |               |
| Lake Geneva                                       | 1019, 369139  | 1317, 440506  | 1424, 508007  | 1089, 343679  | 1290, 407290  | 1550, 479185  |
| Midland                                           | 1408, 444030  | 1435, 542392  | 1579, 587768  | 1555, 424820  | 1389, 472081  | 1739, 593088  |
| Northwest                                         | 575, 260440   | 1026, 325278  | 849, 352834   | 631, 253925   | 979, 291493   | 904, 351691   |
| Zurich                                            | 753, 365687   | 740, 415267   | 880, 488010   | 756, 316728   | 663, 344353   | 921, 443955   |
| East                                              | 593, 282339   | 1117, 369950  | 1528, 390425  | 589, 233062   | 994, 300103   | 1487, 341979  |
| Central                                           | 694, 179458   | 1218, 229857  | 1227, 275223  | 806, 187883   | 1187, 217857  | 1252, 241036  |
| Ticino                                            | 373, 71528    | 529, 104338   | 562, 122401   | 425, 70849    | 523, 98827    | 575, 107024   |
| <b>Highest educational level</b>                  |               |               |               |               |               |               |
| No school/primary                                 | 481, 215272   | 842, 274694   | 951, 292971   | 701, 230403   | 894, 275746   | 1035, 288781  |
| Secondary                                         | 2940, 1057960 | 3599, 1181527 | 3783, 1264045 | 3931, 1223891 | 4315, 1283197 | 4772, 1400556 |
| Tertiary                                          | 1993, 699184  | 2924, 966760  | 3301, 1163362 | 1218, 376452  | 1797, 567319  | 2600, 860448  |
| Missing                                           | 1, 206        | 17, 4608      | 14, 4291      | 1, 201        | 19, 5740      | 21, 8173      |
| <b>Income, SFr</b>                                |               |               |               |               |               |               |
| No income                                         | 139, 60317    | 25, 177565    | 346, 112507   | 679, 222076   | 918, 279067   | 978, 271987   |
| <4500                                             | 1772, 679214  | 2344, 790486  | 2689, 918762  | 3350, 1091013 | 4031, 1221547 | 4953, 1466363 |
| 4500-6000                                         | 1357, 465421  | 1718, 570588  | 1897, 654101  | 746, 210379   | 730, 222686   | 1049, 356014  |
| >6000                                             | 1617, 576518  | 2242, 725455  | 2524, 850147  | 349, 95689    | 461, 132703   | 735, 251417   |
| Missing                                           | 530, 191151   | 827, 263494   | 593, 189153   | 727, 211789   | 885, 276000   | 713, 212177   |
| <b>Marital status</b>                             |               |               |               |               |               |               |
| Single                                            | 1762, 697087  | 2281, 849328  | 2407, 995481  | 1678, 554665  | 1798, 585228  | 2255, 795789  |
| Married                                           | 2915, 1084242 | 4391, 328466  | 4916, 1447463 | 3011, 1017360 | 4400, 1262541 | 5105, 1414870 |
| Widowed                                           | 97, 21835     | 8428, 715     | 71, 24841     | 314, 62188    | 132, 40937    | 206, 59874    |
| Divorced                                          | 639, 168110   | 575, 219908   | 655, 256884   | 846, 196433   | 693, 241865   | 862, 287426   |
| Missing                                           | 2, 1347       | 3, 1171       | 0,0           | 2, 301        | 2, 1431       | 0,0           |
| <b>Sex partners last 12m</b>                      |               |               |               |               |               |               |
| 1                                                 | 4191, 1558594 | 6382, 2095192 | 6498, 2158653 | 4649, 1548175 | 6583, 1995736 | 6960, 2094370 |
| 2-4                                               | 665, 244120   | 731, 243845   | 666, 255717   | 410, 124385   | 397, 121682   | 374, 127432   |
| 5+                                                | 197, 74241    | 228, 77697    | 199, 79313    | 34, 10711     | 29, 8387      | 30, 11663     |
| Missing                                           | 362, 95668    | 41, 10854     | 686, 230987   | 758, 147675   | 16, 6198      | 1064, 324494  |
| <b>Sex frequency last 12m</b>                     | Not asked     |               |               | Not asked     |               |               |
| 1-2 per year                                      | ..            | 271, 80731    | 351, 118565   | ..            | 325, 93051    | 376, 111423   |
| 1 per month                                       | ..            | 828, 261277   | 1028, 329464  | ..            | 864, 249163   | 1124, 338486  |
| 2-3 per month                                     | ..            | 1472, 473009  | 1701, 546318  | ..            | 1283, 375995  | 1718, 511495  |
| 1 per week                                        | ..            | 1991, 650719  | 1944, 665376  | ..            | 1975, 607513  | 2090, 629519  |
| 2-3 per week                                      | ..            | 2267, 765183  | 1962, 693239  | ..            | 2071, 652754  | 1680, 531014  |
| 4+ per week                                       | ..            | 398, 149006   | 320, 118262   | ..            | 257, 79908    | 210, 70530    |

|                                           |               |               |                 |               |               |               |
|-------------------------------------------|---------------|---------------|-----------------|---------------|---------------|---------------|
| Missing                                   | ..            | 155, 47662    | 743, 253443     | ..            | 250, 73619    | 1219, 365490  |
| <b>Partner type last intercourse</b>      | Not asked     |               |                 | Not asked     |               |               |
| Stable                                    | ..            | 6665, 2190882 | 7173, 2393191   | ..            | 6714, 2040553 | 7982, 2409173 |
| Occasional                                | ..            | 677, 226436   | 803, 302565     | ..            | 306, 90071    | 433, 145050   |
| Sex worker                                | ..            | 31, 7646      | 67, 26208       | ..            | 0, 0          | 1, 200        |
| Missing                                   | ..            | 9, 2585       | 6, 2705         | ..            | 5, 1380       | 12, 3535      |
| <b>HIV testing</b>                        |               |               |                 |               |               |               |
| Never tested                              | 3432, 1660169 | 4345, 1383746 | 4580, 1482996   | 4679, 1499320 | 3831, 1128432 | 4344, 1228391 |
| >12m ago                                  | 439, 202837   | 2337, 801418  | 2857, 1017787   | 778, 222246   | 2443, 767295  | 3432, 1096425 |
| Within last 12m                           | 203, 93129    | 487, 171075   | 524, 197190     | 953, 98305    | 568, 182702   | 537, 199462   |
| Missing                                   | 43, 16488     | 213, 71350    | 88, 26695       | 41, 11078     | 183, 53574    | 115, 33680    |
| <b>Alcohol</b>                            |               |               |                 |               |               |               |
| No use                                    | 403, 145469   | 582, 218019   | 818, 285192     | 936, 284968   | 1132, 342310  | 1533, 470954  |
| Daily                                     | 1041, 332620  | 1261, 375407  | 1175, 352970    | 470, 130237   | 549, 152674   | 521, 143233   |
| Weekly                                    | 3010, 1135926 | 4171, 1362093 | 4626, 1583047   | 2432, 791798  | 3137, 958014  | 3963, 1228355 |
| Monthly                                   | 957, 356529   | 1367, 471796  | 1428, 502750    | 2012, 623797  | 2206, 678812  | 2410, 715234  |
| Missing                                   | 4, 2078       | 1, 273        | 2,711           | 1, 146        | 1, 193        | 1, 182        |
| <b>Tobacco</b>                            |               |               |                 |               |               |               |
| Non-smoker                                | 3528, 1279407 | 4891, 1575101 | 5488, 1807651   | 4235, 1338398 | 5175, 1557199 | 6315, 1889971 |
| Casual smoker                             | 550, 203001   | 726, 244321   | 776, 287648     | 415, 134856   | 486, 147355   | 605, 196721   |
| Daily smoker                              | 1337, 490213  | 1764, 606873  | 1785, 629371    | 1199, 357248  | 1364, 427449  | 1507, 471044  |
| Missing                                   | -             | 7, 1293       | 0, 0            | 2, 444        | 0, 0          | 1, 222        |
| <b>Cannabis<sup>b</sup></b>               |               |               |                 |               |               |               |
| No use                                    | 3525, 1284285 | 5302, 1693509 | 5549, 1, 770092 | 4457, 1405317 | 5828, 1740879 | 6547, 1912407 |
| >12m ago                                  | 1302, 485363  | 1525, 548295  | 1836, 683783    | 1035, 334662  | 959, 314830   | 1532, 523148  |
| Within last 12m                           | 311, 123641   | 534, 178092   | 633, 258879     | 114, 36826    | 221, 71061    | 333, 118541   |
| Missing                                   | 277, 7933     | 21, 7693      | 31,11915        | 245, 54142    | 17, 5233      | 13, 3863      |
| <b>Other illicit drugs<sup>b, c</sup></b> |               |               |                 |               |               |               |
| No use                                    | 4837, 1788061 | 6958, 2275033 | 7469, 2479592   | 5441, 1725723 | 6798, 2058121 | 8123, 2444996 |
| >12m ago                                  | 308, 105962   | 392, 140247   | 522, 217782     | 176, 54453    | 217, 70348    | 289, 106705   |
| Within last 12m                           | 13, 4404      | 22, 8031      | 45, 21281       | 2, 754        | 7, 2877       | 12, 5399      |
| Missing                                   | 257, 74195    | 10, 4277      | 13, 6013        | 232, 50016    | 3, 656        | 4, 858        |

- a. Overall denominators for condom use and HIV testing differ because eligibility criteria for answering each question differed;
- b. In 2007 questions about drugs were only asked to people between 15 to 69 years;
- c. Combines use of ecstasy, cocaine, or heroin

Abbreviations: m, months; SFr, Swiss Francs; yrs, years; .., question not asked.

Table S4. Condom use, men and women reporting only opposite-sex partners, 2007. Prevalence and associations with sociodemographic factors, sexual behaviours and substance use

| Condom Use                        | Men 2007            |                        |                                   | Women 2007          |                        |                                   |
|-----------------------------------|---------------------|------------------------|-----------------------------------|---------------------|------------------------|-----------------------------------|
|                                   | Prevalence (95% CI) | Unadjusted OR (95% CI) | Adjusted OR (95% CI) <sup>a</sup> | Prevalence (95% CI) | Unadjusted OR (95% CI) | Adjusted OR (95% CI) <sup>a</sup> |
| <b>Total</b>                      | 26 (24-27)          |                        |                                   | 20 (18-21)          |                        |                                   |
| <b>Age, years</b>                 |                     | p<0.001                | p<0.001                           |                     | p<0.001                | p<0.001                           |
| Median (IQR) <sup>b</sup>         | 18 (16-19)          | 0.93 (0.93, 0.94)      | 0.96 (0.95, 0.97)                 | 18 (16-20)          | 0.95 (0.94, 0.95)      | 0.95 (0.94,0.96)                  |
| 16-24                             | 65 (60-70)          | -                      | -                                 | 43 (38-49)          | -                      | -                                 |
| 25-34                             | 30 (27-34)          | -                      | -                                 | 25 (22-28)          | -                      | -                                 |
| 35-44                             | 21 (19-24)          | -                      | -                                 | 18 (16-21)          | -                      | -                                 |
| 45-54                             | 14 (11-18)          | -                      | -                                 | 12 (10-15)          | -                      | -                                 |
| 55-64                             | 9 (7-12)            | -                      | -                                 | 7 (5-10)            | -                      | -                                 |
| 65-74                             | 9 (7-13)            | -                      | -                                 | 6 (5-10)            | -                      | -                                 |
| <b>Region</b>                     |                     | p=0.9                  |                                   |                     | p=0.015                | p=0.10                            |
| Lake Geneva                       | -                   | reference              | reference                         | -                   | reference              | reference                         |
| Midland                           | 25 (22-28)          | 0.94 (0.74,1.20)       | 0.98 (0.73, 1.33)                 | 19 (16-21)          | 1.00 (0.78, 1.28)      | 1.31 (0.95, 1.79)                 |
| Northwest                         | 25 (21-30)          | 0.95 (0.71,1.26)       | 1.02 (0.72, 1.45)                 | 16 (13-19)          | 0.82 (0.61, 1.11)      | 0.98 (0.67, 1.44)                 |
| Zurich                            | 25 (22-29)          | 0.94 (0.73,1.21)       | 1.11 (0.80, 1.55)                 | 23 (20-27)          | 1.31 (1.01, 1.71)      | 1.53 (1.08, 2.17)                 |
| East                              | 27 (23-32)          | 1.05 (0.78,1.41)       | 0.89 (0.62, 1.29)                 | 21 (17-26)          | 1.18 (0.86, 1.61)      | 1.54 (1.04, 2.27)                 |
| Central                           | 25 (20-29)          | 0.92 (0.68, 1.23)      | 0.92 (0.64, 1.33)                 | 23 (19-27)          | 1.27 (0.96, 1.68)      | 1.31 (0.91, 1.89)                 |
| Ticino                            | 27 (22-33)          | 1.06 (0.77, 1.45)      | 1.07 (0.69, 1.65)                 | 16 (12-20)          | 0.82 (0.58, 1.16)      | 1.05 (0.66, 1.67)                 |
| <b>Highest education level</b>    |                     | p<0.001                | p=0.2                             |                     | p<0.001                | p=0.030                           |
| No school/primary                 | 47 (41-53)          | reference              | reference                         | 26 (22-31)          | reference              | reference                         |
| Secondary                         | 26 (23-28)          | 0.39 (0.30, 0.50)      | 0.71 (0.50, 1.02)                 | 18 (16-19)          | 0.61 (0.47, 0.78)      | 0.65 (0.47, 0.91)                 |
| Tertiary                          | 19 (17-21)          | 0.27 (0.20, 0.35)      | 0.71 (0.47, 1.06)                 | 21 (19-24)          | 0.75 (0.56, 1.00)      | 0.76 (0.52, 1.12)                 |
| <b>Income, SFr</b>                |                     | p<0.001                | p=0.10                            |                     | p=0.6                  | p=0.9                             |
| No Income                         | 48(45-51)           | 2.19 (1.42, 3.38)      |                                   | 38 (35-40)          | 0.87 (0.66, 1.15)      | 1.08 (0.79, 1.47)                 |
| <4500                             | 13 (11-14)          | reference              | reference                         | 10 (9-11)           | reference              | reference                         |
| 4500-6000                         | 6 (3-11)            | 0.46 (0.37, 0.56)      | 0.76 (0.59, 0.98)                 | 15 (10-22)          | 1.06 (0.84, 1.34)      | 0.98 (0.73, 1.33)                 |
| >6000                             | 20 (16-24)          | 0.31 (0.25, 0.39)      | 0.75 (0.56, 1.01)                 | 19 (16-23)          | 0.90 (0.64, 1.27)      | 1.12 (0.73, 1.73)                 |
| <b>Marital status</b>             |                     | p<0.001                | p<0.001                           |                     | p<0.001                | p<0.001                           |
| Single                            | 55 (45-65)          | 6.44 (5.34, 7.76)      | 2.02 (1.53, 2.66)                 | 18 (15-22)          | 5.40 (4.46, 6.55)      | 2.10 (1.58, 2.80)                 |
| Married                           | 36 (33-39)          | reference              | reference                         | 20 (19-22)          | reference              | reference                         |
| Widowed                           | 20 (18-23)          | 0.44 (0.21, 0.91)      | 0.16 (0.04, 0.63)                 | 22 (18-25)          | 1.63 (1.03, 2.60)      | 2.07 (0.98, 4.38)                 |
| Divorced                          | 15 (13-17)          | 1.72 (1.29, 2.31)      | 1.27 (0.87, 1.86)                 | 19 (14-24)          | 2.11 (1.61, 2.77)      | 1.61 (1.10, 2.36)                 |
| <b>Age first intercourse, yrs</b> |                     | p= 0.004               | p<0.001                           |                     | p=0.3                  | p<0.001                           |
| Median (IQR) <sup>b</sup>         | 18 (16-19)          | 0.96 (0.93, 0.99)      | 1.1 (1.06, 1.14)                  | 18 (16.0, 20.0)     | 0.98 (0.95, 1.01)      | 1.11 (1.07, 1.15)                 |
| <16                               | 31 (27-35)          | -                      | -                                 | 23 (20-27)          | -                      | -                                 |
| 16-18                             | 25 (22-27)          | -                      | -                                 | 20 (18-22)          | -                      | -                                 |
| 19-25                             | 23 (21-25)          | -                      | -                                 | 17 (15-19)          | -                      | -                                 |
| 26-30                             | 19 (12-27)          | -                      | -                                 | 20 (13-30)          | -                      | -                                 |
| >30                               | 27 (8-53)           | -                      | -                                 | 30 (10-60)          | -                      | -                                 |
| <b>Sex partners last 12m</b>      |                     | p<0.001                | p<0.001                           |                     | p<0.001                | p<0.001                           |
| 1                                 | 18 (16-19)          | reference              | reference                         | 15 (14-17)          | reference              | reference                         |
| 2-4                               | 54 (49-59)          | 5.39 (4.28, 6.79)      | 2.89 (2.17, 3.85)                 | 50 (44-56)          | 5.45 (4.17, 7.11)      | 2.79 (2.05, 3.80)                 |
| 5+                                | 65 (57-74)          | 8.68 (5.87, 12.8)      | 3.7 (2.31, 5.94)                  | 40 (20-63)          | 3.73 (1.54, 9.03)      | 3.02 (1.22, 7.50)                 |
| <b>HIV testing</b>                |                     | p=0.8                  | p=0.6                             |                     | p=0.016                | p=0.7                             |
| Never                             | 26 (24-27)          | reference              | reference                         | 19 (18-21)          | reference              | reference                         |
| >12m ago                          | 25 (21-30)          | 0.99 (0.77, 1.26)      | 1.09 (0.79, 1.48)                 | 20 (17-24)          | 1.06 (0.84, 1.33)      | 1.11 (0.83, 1.48)                 |
| Within last 12m                   | 28 (21-35)          | 1.11 (0.79, 1.57)      | 0.84 (0.55, 1.29)                 | 27 (22-33)          | 1.56 (1.15, 2.11)      | 1.08 (0.74, 1.58)                 |
| <b>Alcohol</b>                    |                     | p<0.001                | p=0.14                            |                     | p<0.001                | p=0.6                             |
| No use                            | 33 (26-40)          | reference              | reference                         | 18 (15-22)          | reference              | reference                         |
| Daily                             | 14 (11-16)          | 0.31 (0.21, 0.46)      | 0.58 (0.37, 0.92)                 | 10 (7-14)           | 0.50 (0.32,0.77)       | 0.98 (0.55, 1.76)                 |
| Weekly                            | 27 (25-30)          | 0.77 (0.56, 1.08)      | 0.74 (0.50, 1.10)                 | 20 (18-22)          | 1.13 (0.88, 1.46)      | 1.02 (0.73, 1.42)                 |
| Monthly                           | 28 (24-32)          | 0.79 (0.55, 1.13)      | 0.75 (0.49, 1.15)                 | 22 (20-24)          | 1.26 (0.97, 1.62)      | 1.18 (0.84, 1.64)                 |
| <b>Tobacco</b>                    |                     | p=0.044                | p=0.4                             |                     | p=0.008                | p=0.065                           |

|                                          |            |                   |                   |            |                   |                   |
|------------------------------------------|------------|-------------------|-------------------|------------|-------------------|-------------------|
| Non-smoker                               | 24 (22-26) | reference         | reference         | 19 (17-20) | reference         | reference         |
| Casual smoker                            | 27 (22-32) | 1.17 (0.89, 1.53) | 0.94 (0.68, 1.30) | 26 (22-32) | 1.56 (1.17,2.06)  | 0.93 (0.64, 1.37) |
| Daily smoker                             | 29 (26-32) | 1.26 (1.04, 1.51) | 0.83 (0.65, 1.07) | 20 (17-23) | 1.09 (0.89, 1.33) | 0.71 (0.53, 0.95) |
| <b>Cannabis<sup>c</sup></b>              |            | p<0.001           | p=0.8             |            | p<0.001           | p=0.5             |
| No use                                   | 23 (21-25) | reference         | reference         | 18 (17-20) | reference         | reference         |
| >12m ago                                 | 31 (28-34) | 1.51 (1.25, 1.81) | 0.96 (0.75, 1.24) | 24 (21-28) | 1.42 (1.16, 1.75) | 0.98 (0.74, 1.31) |
| Within last 12m                          | 45 (38-52) | 2.83 (2.09, 3.82) | 1.09 (0.72, 1.67) | 39 (29-50) | 2.86 (1.82, 4.49) | 1.37 (0.79, 2.36) |
| <b>Other illicit drugs<sup>c,d</sup></b> |            | p=0.059           | p=0.8             |            | p<0.001           | p=0.017           |
| No use                                   | 26 (25-27) | reference         | reference         | 20 (18-21) | reference         | reference         |
| >12m ago                                 | 33 (27-40) | 1.43 (1.04, 1.96) | 0.88 (0.58, 1.34) | 35 (27-44) | 2.17 (1.47, 3.21) | 2.18 (1.26, 3.61) |
| Within last 12m                          | 38 (8-77)  | 1.75 (0.50, 6.14) | 1.03 (0.14, 7.56) | 49 (1-100) | 3.88 (0.24, 62.2) | 1.90 (0.21, 17.2) |

- Multivariable model includes all variables in the table, p value from Wald test;
- Median age of the proportion who used a condom;
- In 2007 questions about drugs were only asked to people between 15 to 69 years;
- Combines use of ecstasy, cocaine, or heroin.

Abbreviations: CI, confidence interval; m, months; OR, odds ratio; SFr, Swiss Francs; yrs, years.

Table S5. Condom use at last sexual intercourse, men and women with only opposite-sex partners, 2012 and 2017. Univariable logistic regression

|                                        | Men 2012                            | Men 2017                            | Women 2012                          | Women 2017                          |
|----------------------------------------|-------------------------------------|-------------------------------------|-------------------------------------|-------------------------------------|
| Condom use                             | Unadjusted OR (95% CI) <sup>a</sup> | Unadjusted OR (95% CI) <sup>a</sup> | Unadjusted OR (95% CI) <sup>a</sup> | Unadjusted OR (95% CI) <sup>a</sup> |
| <b>Age, yrs</b>                        | p<0.001                             | p<0.001                             | p<0.001                             | p<0.001                             |
|                                        | 0.92 (0.92, 0.93)                   | 0.94 (0.93, 0.94)                   | 0.93 (0.92, 0.93)                   | 0.94 (0.94, 0.95)                   |
| <b>Region</b>                          | p=0.4                               | p=0.8                               | p=0.13                              | p=0.009                             |
| Lake Geneva                            | reference                           | reference                           | reference                           | reference                           |
| Midland                                | 0.88 (0.71, 1.10)                   | 0.89 (0.74, 1.08)                   | 1.33 (1.04, 1.71)                   | 0.75 (0.62, 0.91)                   |
| Northwest                              | 0.94 (0.74, 1.18)                   | 0.94 (0.75, 1.17)                   | 1.25 (0.95, 1.64)                   | 0.97 (0.78, 1.21)                   |
| Zurich                                 | 0.96 (0.75, 1.23)                   | 0.98 (0.79, 1.21)                   | 1.36 (1.03, 1.79)                   | 0.97 (0.78, 1.20)                   |
| East                                   | 0.93 (0.71, 1.21)                   | 0.9 (0.74, 1.10)                    | 1.29 (0.97, 1.72)                   | 1 (0.82, 1.23)                      |
| Central                                | 1.11 (0.88, 1.39)                   | 1.03 (0.83, 1.28)                   | 1.44 (1.12, 1.84)                   | 0.96 (0.76, 1.21)                   |
| Ticino                                 | 0.79 (0.60, 1.05)                   | 0.96 (0.75, 1.23)                   | 1.33 (0.97, 1.82)                   | 0.68 (0.52, 0.89)                   |
| <b>Highest education level</b>         | p<0.001                             | p<0.001                             | p=0.025                             | p<0.001                             |
| No school/primary                      | reference                           | reference                           | reference                           | reference                           |
| Secondary                              | 0.59 (0.48, 0.72)                   | 0.64 (0.54, 0.77)                   | 0.79 (0.62, 1.01)                   | 0.76 (0.63, 0.92)                   |
| Tertiary                               | 0.4 (0.33, 0.50)                    | 0.64 (0.54, 0.77)                   | 0.98 (0.74, 1.28)                   | 0.99 (0.81, 1.21)                   |
| <b>Income, SFr</b>                     | p<0.001                             | p<0.001                             | p<0.001                             | p=0.3                               |
| No income                              | 2.62 (1.85, 3.69)                   | 1.91 (1.46, 2.49)                   | 1.19 (0.95, 1.47)                   | 1.23 (1.02, 1.49)                   |
| <4500                                  | reference                           | reference                           | reference                           | reference                           |
| 4500-6000                              | 0.44 (0.36, 0.54)                   | 0.56 (0.47, 0.66)                   | 0.91 (0.69, 1.20)                   | 1.1 (0.91, 1.34)                    |
| >6000                                  | 0.33 (0.28, 0.40)                   | 0.45 (0.38, 0.52)                   | 0.96 (0.69, 1.34)                   | 1.01 (0.80, 1.28)                   |
| <b>Marital status</b>                  | p<0.001                             | p<0.001                             | p<0.001                             | p<0.001                             |
| Single                                 | 6.73 (5.72, 7.91)                   | 6.37 (5.54, 7.32)                   | 4.92 (4.15, 5.84)                   | 4.25 (3.69, 4.90)                   |
| Married                                | reference                           | reference                           | reference                           | reference                           |
| Widowed                                | 0.97 (0.47, 2.03)                   | 0.98 (0.38, 2.50)                   | 0.96 (0.48, 1.95)                   | 0.81 (0.47, 1.39)                   |
| Divorced                               | 1.5 (1.10, 2.05)                    | 1.6 (1.23, 2.07)                    | 1.22 (0.87, 1.70)                   | 1.68 (1.35, 2.10)                   |
| <b>Age first intercourse, yrs</b>      | p<0.001                             | p=0.3                               | p<0.001                             | p=0.9                               |
| Per year increase                      | 0.9 (0.88, 0.93)                    | 0.99 (0.98, 1.01)                   | 0.93 (0.90, 0.96)                   | 1 (0.98, 1.02)                      |
| <b>Sex partners last 12m</b>           | p<0.001                             | p<0.001                             | p<0.001                             | p<0.001                             |
| 1                                      | reference                           | reference                           | reference                           | reference                           |
| 2-4                                    | 8.78 (7.03, 11.0)                   | 6.55 (5.33, 8.05)                   | 6.92 (5.32, 9.00)                   | 5.71 (4.46, 7.33)                   |
| 5+                                     | 12.3 (7.97, 19.1)                   | 11.6 (7.84, 17.2)                   | 8.71 (3.38, 22.4)                   | 5.81 (2.45, 13.8)                   |
| <b>Sex frequency last 12 m</b>         | p<0.001                             | p<0.001                             | p<0.001                             | p<0.001                             |
| 1-2 per year                           | 2.53 (1.76, 3.63)                   | 1.78 (1.32, 2.39)                   | 2.24 (1.53, 3.28)                   | 1.96 (1.45, 2.66)                   |
| 1 per month                            | reference                           | reference                           | reference                           | reference                           |
| 2-3 per month                          | 0.81 (0.62, 1.04)                   | 0.85 (0.69, 1.04)                   | 0.94 (0.72, 1.23)                   | 0.83 (0.67, 1.04)                   |
| 1 per week                             | 0.47 (0.36, 0.61)                   | 0.62 (0.51, 0.77)                   | 0.66 (0.51, 0.86)                   | 0.74 (0.59, 0.91)                   |
| 2-3 per week                           | 0.54 (0.42, 0.70)                   | 0.45 (0.36, 0.55)                   | 0.62 (0.48, 0.80)                   | 0.7 (0.55, 0.87)                    |
| 4+ per week                            | 0.66 (0.45, 0.96)                   | 0.56 (0.39, 0.81)                   | 0.51 (0.27, 0.98)                   | 0.68 (0.44, 1.04)                   |
| <b>Partner type last intercourse</b>   | p<0.001                             | p<0.001                             | p<0.001                             | p<0.001                             |
| Stable                                 | reference                           | reference                           | reference                           | reference                           |
| Occasional                             | 20.8 (15.8, 27.5)                   | 12.2 (9.98, 14.9)                   | 14 (10.1, 19.4)                     | 9.46 (7.37, 12.1)                   |
| Sex worker                             | 26.1 (9.52, 71.4)                   | 26.3 (11.1, 62.8)                   | -                                   | -                                   |
| <b>HIV testing</b>                     | p<0.001                             | p<0.001                             | p<0.001                             | p<0.001                             |
| Never tested                           | reference                           | reference                           | reference                           | reference                           |
| >12m ago                               | 0.84 (0.71, 0.99)                   | 0.95 (0.84, 1.09)                   | 0.91 (0.77, 1.08)                   | 1.03 (0.90, 1.17)                   |
| Within last 12m                        | 1.9 (1.45, 2.50)                    | 1.77 (1.41, 2.22)                   | 1.58 (1.23, 2.04)                   | 1.83 (1.45, 2.31)                   |
| <b>Alcohol</b>                         | p<0.001                             | p=0.001                             | p<0.001                             | p<0.001                             |
| No use                                 | reference                           | reference                           | reference                           | reference                           |
| Daily                                  | 0.37 (0.26, 0.52)                   | 0.28 (0.21, 0.38)                   | 0.42 (0.27, 0.65)                   | 0.35 (0.24, 0.52)                   |
| Weekly                                 | 0.86 (0.65, 1.14)                   | 0.83 (0.68, 1.01)                   | 1.33 (1.04, 1.69)                   | 0.87 (0.74, 1.04)                   |
| Monthly                                | 0.88 (0.64, 1.20)                   | 1.06 (0.84, 1.32)                   | 1.67 (1.30, 2.15)                   | 1.02 (0.84, 1.22)                   |
| <b>Tobacco</b>                         | p=0.11                              | p=0.11                              | p<0.001                             | p<0.001                             |
| Non-smoker                             | reference                           | reference                           | reference                           | reference                           |
| Casual smoker                          | 1.44 (1.12, 1.86)                   | 1.24 (1.01, 1.51)                   | 1.68 (1.29, 2.19)                   | 1.79 (1.45, 2.22)                   |
| Daily smoker                           | 1.27 (1.07, 1.49)                   | 1.02 (0.88, 1.19)                   | 1.21 (0.99, 1.48)                   | 1.11 (0.94, 1.31)                   |
| <b>Cannabis</b>                        | p<0.001                             | p<0.001                             | p<0.001                             | p<0.001                             |
| No use                                 | reference                           | reference                           | reference                           | reference                           |
| >12m ago                               | 1.17 (0.97, 1.41)                   | 1.15 (0.99, 1.34)                   | 1.42 (1.15, 1.75)                   | 1.28 (1.09, 1.49)                   |
| Within last 12m                        | 2.97 (2.35, 3.74)                   | 1.99 (1.61, 2.44)                   | 3.17 (2.17, 4.63)                   | 2.41 (1.83, 3.16)                   |
| <b>Other illicit drugs<sup>b</sup></b> | p<0.001                             | p<0.001                             | p=0.016                             | p=0.075                             |
| No use                                 | reference                           | reference                           | reference                           | reference                           |



|                 |                   |                   |                   |                   |
|-----------------|-------------------|-------------------|-------------------|-------------------|
| >12m ago        | 1.48 (1.11, 1.97) | 1.24 (0.98, 1.57) | 1.62 (1.09, 2.41) | 1.15 (0.82, 1.60) |
| Within last 12m | 5.12 (1.66, 15.7) | 1.63 (0.84, 3.17) | 3.89 (0.75, 20.3) | 4.41 (1.17, 16.6) |

a. p value from Wald test;

b. Combines use of ecstasy, cocaine, or heroin.

Abbreviations: CI, confidence interval; m, months; NA, not applicable; OR, odds ratio; SFr, Swiss Francs; yrs, years.

Table S6. Condom use at last sexual intercourse, men and women with any same-sex partners. Denominators, unweighted and weighted, and number of missing values for each survey and variable

| Condom use                                        | Men<br>2007      | Men<br>2012 | Men<br>2017 | Women<br>2007    | Women<br>2012 | Women<br>2017 |
|---------------------------------------------------|------------------|-------------|-------------|------------------|---------------|---------------|
| <b>Totals, N unweighted, weighted<sup>a</sup></b> | 191, 66118       | 245, 84238  | 183, 76438  | 205, 63179       | 300, 96257    | 172, 69018    |
| <b>Age, years</b>                                 |                  |             |             |                  |               |               |
| 16-24                                             | 7, 3497          | 20, 5643    | 25, 8197    | 18, 8593         | 55, 15295     | 35, 14084     |
| 25-34                                             | 46, 18408        | 34, 14478   | 32, 17291   | 49, 17849        | 80, 31574     | 55, 25382     |
| 35-44                                             | 63, 21425        | 68, 27822   | 40, 18722   | 63, 15055        | 66, 20741     | 30, 12090     |
| 45-54                                             | 35, 10938        | 62, 19514   | 38, 16023   | 53, 16743        | 65, 18851     | 36, 12713     |
| 55-64                                             | 27, 8762         | 40, 11544   | 37, 13623   | 17, 3800         | 24, 6718      | 10, 3117      |
| 65-74                                             | 13, 3089         | 21, 5235    | 11, 2581    | 5, 1139          | 10, 3077      | 6, 1631       |
| <b>Region</b>                                     |                  |             |             |                  |               |               |
| Lake Geneva                                       | 30,11415         | 45, 15147   | 46, 19171   | 54, 14541        | 64, 19810     | 43, 16336     |
| Midland                                           | 50,16811         | 36, 15951   | 18, 8757    | 43, 11187        | 53, 18694     | 38, 18342     |
| Northwest                                         | 18,6636          | 44, 11119   | 20, 11332   | 29, 10918        | 59, 18221     | 16, 6521      |
| Zurich                                            | 48,19165         | 51, 24919   | 38, 19435   | 43, 17835        | 41, 21542     | 26, 14769     |
| East                                              | 20,6109          | 28, 9991    | 27, 10121   | 15, 4411         | 31, 8353      | 20, 6475      |
| Central                                           | 14,3722          | 34, 5939    | 26, 5903    | 17, 3850         | 37, 6536      | 20, 4442      |
| Ticino                                            | 11,2261          | 7, 1170     | 8, 1718     | 4, 437           | 15, 3100      | 9, 2133       |
| <b>Highest educational level</b>                  |                  |             |             |                  |               |               |
| No school/ primary                                | 8, 3424          | 19, 4915    | 16, 5477    | 10, 3162         | 28, 8517      | 17, 5036      |
| Secondary                                         | 101, 31318       | 111, 39221  | 83, 32537   | 121, 39253       | 160, 54460    | 83, 33636     |
| Tertiary                                          | 82, 31377        | 115, 40102  | 84, 38423   | 74, 20764        | 112, 33279    | 72, 30346     |
| Missing                                           | 0, 0             | 0, 0        | 0, 0        | 0, 0             | 0, 0          | 0, 0          |
| <b>Income, SFr</b>                                |                  |             |             |                  |               |               |
| No Income                                         | 5, 2205          | 9, 2488     | 12, 3984    | 14, 5114         | 20, 6896      | 8, 2581       |
| <4500                                             | 72, 26242        | 70, 22070   | 64, 26740   | 111, 34980       | 184, 59501    | 106, 44156    |
| 4500-6000                                         | 48, 16155        | 49, 16453   | 45, 19462   | 41, 12314        | 39, 11864     | 31, 10373     |
| >6000                                             | 50, 17086        | 85, 32340   | 50, 20141   | 23, 5677         | 29, 9141      | 22, 9965      |
| Missing                                           | 16, 4432         | 32, 10885   | 12, 6110    | 16, 5094         | 28, 8854      | 5, 1943       |
| <b>Marital status</b>                             |                  |             |             |                  |               |               |
| Single                                            | 126, 42994       | 121, 46054  | 122, 52867  | 111, 32720       | 149, 49696    | 111, 47453    |
| Married                                           | 38, 13661        | 101, 28417  | 18, 5042    | 42, 16386        | 105, 29705    | 22, 7883      |
| Widowed                                           | 0, 0             | 1, 178      | 0, 0        | 3, 634           | 5, 1679       | 2, 428        |
| Divorced                                          | 26, 8350         | 22, 9589    | 14, 5571    | 49, 13439        | 40, 14608     | 14, 5518      |
| Missing                                           | 1, 1113          | 0, 0        | 29, 12956   | 0, 0             | 1, 569        | 23, 7735      |
| <b>Age first intercourse, yrs</b>                 |                  |             |             |                  |               |               |
| <16                                               | 59, 23916        | 94, 34200   | 70, 29812   | 89, 29114        | 162, 50085    | 76, 30797     |
| 16-18                                             | 63, 94439        | 80, 28715   | 64, 26995   | 71, 23506        | 87, 29698     | 53, 22093     |
| 19-25                                             | 60, 19581        | 64, 19584   | 44, 17456   | 42, 10261        | 44, 14199     | 40, 14872     |
| 26-30                                             | 3, 853           | 3, 746      | 3, 1175     | 1, 69            | 1, 183        | 2, 1003       |
| >30                                               | 1, 183           | 0, 0        | 0, 0        | 2, 230           | 2, 830        | 0, 0          |
| Missing                                           | 5, 1613          | 2, 992      | 1, 998      | 0, 0             | 2, 1261       | 1, 254        |
| <b>Sex partners last 12m</b>                      |                  |             |             |                  |               |               |
| 1                                                 | 72,27206         | 163, 53952  | 89, 36364   | 125, 42000       | 241, 79105    | 106, 44848    |
| 2-4                                               | 67,22612         | 48, 18743   | 41, 19755   | 35, 10162        | 45, 13384     | 41, 16743     |
| 5+                                                | 29,10790         | 29, 10335   | 38, 15068   | 14, 3568         | 14, 3767      | 7, 3005       |
| Missing                                           | 23, 5511         | 4, 1208     | 15, 5250    | 31, 7448         | 0, 0          | 18, 2506      |
| <b>Sex frequency last 12m</b>                     | <b>Not asked</b> |             |             | <b>Not asked</b> |               |               |
| 1-2 per year                                      | ..               | 11, 3497    | 13, 3918    | ..               | 22, 6591      | 8, 3402       |
| 1 per month                                       | ..               | 27, 7807    | 26, 10429   | ..               | 32, 10029     | 29, 11156     |
| 2-3 per month                                     | ..               | 51, 16847   | 43, 19311   | ..               | 54, 19159     | 32, 12295     |

|                                           |                  |            |            |                  |            |            |
|-------------------------------------------|------------------|------------|------------|------------------|------------|------------|
| 1 per week                                | ..               | 58, 16937  | 41, 18896  | ..               | 69, 21662  | 38, 15715  |
| 2-3 per week                              | ..               | 76, 33157  | 39, 16550  | ..               | 83, 27004  | 31, 15140  |
| 4+ per week                               | ..               | 17, 4665   | 7, 2827    | ..               | 33, 10111  | 16, 6888   |
| Missing                                   | ..               | 5, 1327    | 14, 4504   | ..               | 7, 1701    | 18, 4422   |
| <b>Partner type, last intercourse</b>     | <b>Not asked</b> |            |            | <b>Not asked</b> |            |            |
| Stable                                    | ..               | 188, 67115 | 102, 43535 | ..               | 255, 84285 | 137, 54869 |
| Occasional                                | ..               | 53, 16300  | 76, 31278  | ..               | 45, 11972  | 33, 13418  |
| Sex worker                                | ..               | 4, 822     | 5, 1625    | ..               | 0, 0       | 0, 0       |
| Missing                                   | ..               | 0, 0       | 0, 0       | ..               | 0, 0       | 2, 731     |
| <b>HIV testing</b>                        |                  |            |            |                  |            |            |
| Never tested                              | 94, 32314        | 61, 16837  | 37, 12357  | 129, 39530       | 81, 27912  | 56,21757   |
| >12m ago                                  | 49, 17309        | 111, 40139 | 80, 33188  | 45, 13132        | 158, 48215 | 80, 33248  |
| Within last 12m                           | 44, 15623        | 66, 24807  | 61, 28525  | 28, 9144         | 52, 16840  | 36, 14012  |
| Missing                                   | 4, 871           | 7, 2454    | 5, 2367    | 3, 1373          | 9, 3289    | 0, 0       |
| <b>Alcohol</b>                            |                  |            |            |                  |            |            |
| No use                                    | 18, 4430         | 28, 8021   | 13, 4645   | 18, 6690         | 33, 10778  | 24, 10064  |
| Daily                                     | 37, 13811        | 37, 12283  | 30, 10228  | 24, 6480         | 24, 7291   | 11, 4582   |
| Weekly                                    | 99, 33535        | 137, 48188 | 101, 46129 | 109, 32512       | 161, 49932 | 93, 36322  |
| Monthly                                   | 37, 14343        | 43, 15746  | 39, 15436  | 53, 17245        | 82, 28256  | 44, 18050  |
| Missing                                   | 0, 0             | 0, 0       | 0, 0       | 1, 252           | 0, 0       | 0, 0       |
| <b>Tobacco</b>                            |                  |            |            |                  |            |            |
| Non-smoker                                | 104, 38210       | 141, 48931 | 106, 45271 | 97, 28610        | 143, 49064 | 84, 34367  |
| Casual smoker                             | 23, 6326         | 31, 11905  | 18, 5952   | 20, 6154         | 51, 16581  | 19, 7859   |
| Daily smoker                              | 64, 21582        | 73, 23402  | 59, 25215  | 88, 28415        | 106, 30611 | 69, 26792  |
| Missing                                   | 0, 0             | 0, 0       | 0, 0       | 0, 0             | 0, 0       | 0, 0       |
| <b>Cannabis<sup>b</sup></b>               |                  |            |            |                  |            |            |
| No use                                    | 91, 26776        | 129, 42310 | 94, 38959  | 79, 23164        | 103, 33352 | 74, 28862  |
| >12m ago                                  | 63, 27025        | 74, 25507  | 56, 25133  | 91, 28213        | 133, 44220 | 65, 26828  |
| Within last 12m                           | 29, 9899         | 40, 15510  | 31, 11225  | 32, 10254        | 64, 18685  | 31, 12594  |
| Missing                                   | 8, 2418          | 2, 910     | 2, 1121    | 3, 1547          | 0          | 2, 734     |
| <b>Other illicit drugs<sup>b, c</sup></b> |                  |            |            |                  |            |            |
| No use                                    | 142, 47328       | 185, 60328 | 148, 62088 | 154, 47431       | 234, 75008 | 136, 53648 |
| Any use                                   | 42, 16651        | 57, 23152  | 35, 14350  | 51, 15748        | 66, 21248  | 36, 15370  |
| Missing                                   | 7, 2140          | 3, 757     | 0, 0       | 0, 0             | 0, 0       | 0, 0       |

- Overall denominators for condom use and HIV testing differ because eligibility criteria for answering each question differed;
- In 2007 questions about drugs were only asked to people between 15 to 69 years;
- Combines use of ecstasy, cocaine, or heroin and combines categories of use more than 12 months ago and use within last 12 months.

Abbreviations: m, months; SFr, Swiss Francs; yrs, years; ..., question not asked

Table S7. Condom use, men reporting any same-sex partner. Associations with sociodemographic factors, sexual behaviours and substance use from univariable logistic regression, 2007, 2012, 2017 and from multivariable logistic regression, 2007.

| Condom Use                                  | 2007                   | 2007                              | 2012                   | 2017                   |
|---------------------------------------------|------------------------|-----------------------------------|------------------------|------------------------|
|                                             | Unadjusted OR (95% CI) | Adjusted OR (95% CI) <sup>a</sup> | Unadjusted OR (95% CI) | Unadjusted OR (95% CI) |
| <b>Age, years</b>                           | p<0.001                | p=0.057                           | p<0.001                | p<0.001                |
| <b>Per year increase</b>                    | 0.97 (0.94-1.00)       | 0.97 (0.93, 1.00)                 | 0.95 (0.92, 0.97)      | 0.95 (0.93, 0.98)      |
| <b>Region</b>                               | p=0.9                  |                                   | p=0.4                  | P=0.9                  |
| Lake Geneva                                 | reference              |                                   | reference              | reference              |
| Midland                                     | 1.46 (0.44, 4.85)      |                                   | 0.62 (0.20, 1.98)      | 0.99 (0.29, 3.32)      |
| Northwest                                   | 0.78 (0.18, 3.34)      |                                   | 0.86 (0.30, 2.49)      | 1.12 (0.35, 3.55)      |
| Zurich                                      | 1.19 (0.39, 3.59)      |                                   | 1.69 (0.68, 4.21)      | 0.86 (0.33, 2.21)      |
| East                                        | 1.09 (0.26, 4.59)      |                                   | 1.5 (0.44, 5.04)       | 0.85 (0.27, 2.64)      |
| Central                                     | 3.04 (0.51, 18.0)      |                                   | 0.65 (0.21, 1.95)      | 1.47 (0.49, 4.42)      |
| Ticino                                      | 0.95 (0.14, 6.36)      |                                   | 2.06 (0.32, 13.4)      | 1.09 (0.21, 5.71)      |
| <b>Highest education level</b>              | p=0.013                |                                   | p=0.2                  | p=0.5                  |
| No school/primary                           | reference              |                                   | reference              | reference              |
| Secondary                                   | 0.11 (0.02, 0.66)      |                                   | 0.41 (0.10, 1.71)      | 0.51 (0.14, 1.82)      |
| Tertiary                                    | 0.07 (0.01, 0.44)      |                                   | 0.7 (0.17, 2.84)       | 0.64 (0.18, 2.29)      |
| <b>Income, SFr</b>                          | p=0.11                 |                                   | p=0.2                  | P=>0.9                 |
| No Income                                   | 16.5 (1.43, 191)       |                                   | 2.88 (0.53, 15.5)      | 0.72 (0.18, 2.93)      |
| <4500                                       | reference              |                                   | reference              | reference              |
| 4500-6000                                   | 0.81 (0.31, 2.08)      |                                   | 1.41 (0.54, 3.72)      | 1.1 (0.44, 2.76)       |
| >6000                                       | 0.87 (0.35, 2.16)      |                                   | 0.71 (0.29, 1.73)      | 1.1 (0.48, 2.55)       |
| <b>Marital Status</b>                       | p.001                  |                                   | p=<0.001               | p=0.001                |
| Single                                      | 3.33 (1.25-8.87)       |                                   | 1.88 (0.89, 3.98)      | 12.4 (3.00, 51.2)      |
| Married                                     | reference              |                                   | reference              | reference              |
| Widowed                                     | NA                     |                                   | -                      | -                      |
| Divorced                                    | 0.43 (0.12, 1.60)      |                                   | 2.12 (0.59, 7.69)      | 5.3 (0.82, 34.1)       |
| <b>Age first sexual intercourse, years</b>  | p=0.8                  |                                   | p=0.2                  | p=0.4                  |
| <b>Median (IQR)</b>                         | 0.99 (0.89, 1.09)      |                                   | 0.93 (0.84, 1.05)      | 1.04 (0.94, 1.16)      |
| <b>Sex partners 12m</b>                     | p=0.015                | p=0.014                           | p<0.001                | p<0.001                |
| 1                                           | reference              | reference                         | reference              | reference              |
| 2-4                                         | 3.45 (1.28, 9.28)      | 3.73 (1.40, 9.92)                 | 3.86 (1.51, 9.87)      | 5.55 (2.02, 15.2)      |
| 5+                                          | 5.31 (1.50, 18.7)      | 4.70 (1.30, 16.9)                 | 22.6 (5.56, 91.9)      | 13.4 (4.62, 38.6)      |
| <b>Average sex frequency 12 m</b>           | Not asked              |                                   | p=0.030                | p=0.006                |
| 1-2 times per year                          | ..                     |                                   | 3.10 (0.54, 18.0)      | 7.55 (1.08, 52.5)      |
| Once per month                              | ..                     |                                   | reference              | reference              |
| 2-3 per month                               | ..                     |                                   | 0.47 (0.14, 1.55)      | 0.96 (0.29, 3.15)      |
| Once per week                               | ..                     |                                   | 0.58 (0.19, 1.83)      | 0.4 (0.12, 1.38)       |
| 2-3t/week                                   | ..                     |                                   | 0.33 (0.11, 1.00)      | 0.31 (0.09, 1.05)      |
| 4>/week                                     | ..                     |                                   | 0.20 (0.04, 0.92)      | 1.78 (0.20, 15.8)      |
| <b>Type of partner last sex intercourse</b> | Not asked              |                                   | p<0.001                | p<0.001                |
| Stable partner                              | ..                     |                                   | reference              | reference              |
| Occasional partner                          | ..                     |                                   | 9.85 (4.14, 23.5)      | 9.81 (4.46, 21.6)      |
| Sex-worker                                  | ..                     |                                   | 25.1 (2.35, 269)       | 5.94 (0.61, 57.5)      |
| <b>HIV Testing</b>                          | p=0.051                |                                   | p<0.001                | p<0.001                |
| Never tested                                | reference              |                                   | reference              | reference              |
| Tested >2m                                  | 1.57 (0.63, 3.88)      |                                   | 1.08 (0.41, 2.87)      | 0.57 (0.22, 1.47)      |
| Tested in last 12m                          | 2.95 (1.22, 7.09)      |                                   | 4.76 (1.70, 13.3)      | 1.46 (0.55, 3.90)      |
| <b>Alcohol</b>                              | p=0.9                  |                                   | p=0.001                | p=0.3                  |
| No use                                      | reference              |                                   | reference              | reference              |
| Daily                                       | 0.8 (0.21, 3.03)       |                                   | 0.09 (0.02, 0.34)      | 0.29 (0.07, 1.28)      |
| Weekly                                      | 1.15 (0.33, 3.97)      |                                   | 0.4 (0.15, 1.10)       | 0.53 (0.14, 2.03)      |
| Monthly                                     | 1.11 (0.28, 4.43)      |                                   | 0.16 (0.05, 0.56)      | 0.6 (0.14, 2.61)       |
| <b>Tobacco</b>                              | p= 0.031               |                                   | p=0.6                  | p=0.2                  |
| Non-smoker                                  | reference              |                                   | reference              | reference              |
| Casual smoker                               | 4.09 (1.32, 12.6)      |                                   | 0.66 (0.22, 1.95)      | 2.26 (0.71, 7.19)      |
| Daily smoker                                | 1.89 (0.82, 4.40)      |                                   | 1.2 (0.59, 2.41)       | 0.76 (0.36, 1.63)      |
| <b>Cannabis<sup>b</sup></b>                 | p= 0.031               |                                   | p=0.9                  | p=0.8                  |
| No use                                      | reference              |                                   | reference              | reference              |
| >12m ago                                    | 2.9 (1.01, 8.34)       |                                   | 1.14 (0.55, 2.38)      | 1.22 (0.56-2.68)       |
| Within last 12m                             | 0.64 (0.27, 1.53)      |                                   | 1.01 (0.38, 2.64)      | 1.32 (0.51-3.39)       |
| <b>Other illicit drugs<sup>b, c</sup></b>   | p= 0.089               |                                   | p=0.2                  | p=0.5                  |
| No use                                      | reference              |                                   | reference              | reference              |
| Any use <sup>b</sup>                        | 2.09 (0.89, 4.91)      |                                   | 0.61 (0.27, 1.37)      | 1.31 (0.58,3.10)       |

a. Multivariable model for 2007, includes age and number of sex partners; p value from Wald test;

---

b. In 2007 questions about drugs were only asked to people between 15 to 69 years;

c. Combines use of ecstasy, cocaine, or heroin and combines categories of use more than 12 months ago and use within last 12 months.

Abbreviations: CI, confidence interval; m, months; OR, odds ratio; SFr, Swiss Francs; yrs, years.

Table S8. Condom use, women reporting any same-sex partner. Associations with sociodemographic factors, sexual behaviours and substance use from univariable logistic regression, 2007, 2012, 2017 and from multivariable logistic regression 2007 and multivariable logistic regression 2012, 2017.

| Condom Use                           | 2007                |                        |                                   | 2012                |                        |                     | 2017                   |                                   |  |
|--------------------------------------|---------------------|------------------------|-----------------------------------|---------------------|------------------------|---------------------|------------------------|-----------------------------------|--|
|                                      | Prevalence (95 CI%) | Unadjusted OR (95% CI) | Adjusted OR (95% CI) <sup>a</sup> | Prevalence (95 CI%) | Unadjusted OR (95% CI) | Prevalence (95 CI%) | Unadjusted OR (95% CI) | Adjusted OR (95% CI) <sup>a</sup> |  |
|                                      | 23 (17-31)          |                        |                                   |                     |                        |                     |                        |                                   |  |
| <b>Year</b>                          |                     |                        |                                   |                     |                        |                     |                        | 0.084                             |  |
| 2012                                 | ..                  |                        |                                   | 27 (21-33)          |                        | ..                  |                        | reference                         |  |
| 2017                                 | ..                  |                        |                                   | ..                  |                        | 25 (18-33)          |                        | 0.59 (0.32, 1.08)                 |  |
| <b>Age, years</b>                    |                     | p=0.058                | p=0.2                             |                     | p=0.009                |                     | p<0.001                | p=0.011                           |  |
| Median (IQR) <sup>b</sup>            | 31 (24-43)          | 0.96(0.93-1.00)        | 0.97 (0.92, 1.02)                 | 30 (22-41)          | 0.96 (0.93, 0.99)      | 26 (23-31)          | 0.92 (0.88, 0.96)      | 0.96 (0.94, 0.98)                 |  |
| 16-24                                | 51 (22-79)          | ..                     | ..                                | 49 (33-66)          | ..                     | 39 (21-60)          | ..                     | ..                                |  |
| 25-34                                | 29 (17-45)          | ..                     | ..                                | 28 (17-42)          | ..                     | 35 (22-51)          | ..                     | ..                                |  |
| 35-44                                | 13 (7-23)           | ..                     | ..                                | 22 (12-35)          | ..                     | 18 (7-40)           | ..                     | ..                                |  |
| 45-54                                | 12 (6-23)           | ..                     | ..                                | 18 (9-32)           | ..                     | 5 (1-16)            | ..                     | ..                                |  |
| 55-64                                | 34 (10-71)          | ..                     | ..                                | 19 (3-51)           | ..                     | 0 (0-0)             | ..                     | ..                                |  |
| 65-74                                | 20 (0-94)           | ..                     | ..                                | 6 (0-69)            | ..                     | 11 (0-0)            | ..                     | ..                                |  |
| <b>Highest educational level</b>     |                     | p=0.7                  |                                   |                     | p=0.6                  |                     | p=0.5                  |                                   |  |
| No school/primary                    | 16 (0-41)           | reference              | ..                                | 37 (16-62)          | reference              | 38 (10-73)          | reference              | ..                                |  |
| Secondary                            | 26 (16-36)          | 1.87 (0.26, 13.5)      | ..                                | 25 (17-34)          | 0.57 (0.21, 1.58)      | 27 (17-39)          | 0.61 (0.16, 2.30)      | ..                                |  |
| Tertiary                             | 21 (11-32)          | 1.43 (0.19, 10.6)      | ..                                | 27 (18-38)          | 0.64 (0.22, 1.81)      | 21 (11-33)          | 0.44 (0.11, 1.69)      | ..                                |  |
| <b>Income, SFr</b>                   |                     | p=0.11                 |                                   |                     | p=0.025                |                     | p=0.9                  |                                   |  |
| No Income                            | 22 (0-47)           | 1.00 (0.20, 4.99)      | ..                                | 10 (1-30)           | 0.28 (0.07, 1.10)      | 35 (3-83)           | 1.58 (0.33, 7.64)      | ..                                |  |
| <4500                                | 22 (12-31)          | reference              | ..                                | 29 (21-37)          | reference              | 26 (17-36)          | reference              | ..                                |  |
| 4500-6000                            | 24 (9-39)           | 1.15 (0.42, 3.12)      | ..                                | 32 (17-52)          | 0.57 (0.21, 1.58)      | 23 (7-46)           | 0.61 (0.16, 2.30)      | ..                                |  |
| >6000                                | 32 (6-57)           | 1.66 (0.45, 6.08)      | ..                                | 8 (2-21)            | 0.64 (0.22, 1.81)      | 21 (6-47)           | 0.44 (0.11, 1.69)      | ..                                |  |
| <b>Marital Status</b>                |                     | p<0.001                |                                   |                     | p<0.001                |                     | p<0.001                |                                   |  |
| Single                               | 34 (23-45)          | 4.33 (1.33, 14.1)      | ..                                | 39 (30-49)          | 4.36 (2.05, 9.27)      | 40 (17-69)          | 0.55 (0.17, 1.74)      | ..                                |  |
| Married                              | 11 (0-21)           | reference              | ..                                | 13 (7-22)           | reference              | 0 (0-0)             | reference              | ..                                |  |
| Widowed                              | 0 (0-0)             | -                      | ..                                | 16 (0-46)           | 1.29 (0.12, 13.3)      | 11 (2-47)           | -                      | ..                                |  |
| Divorced                             | 15 (5-26)           | 1.49 (0.39, 5.73)      | ..                                | 15 (6-35)           | 1.39 (0.39, 5.02)      | 40 (17-69)          | 0.18 (0.03, 1.06)      | ..                                |  |
| <b>Age first intercourse, yrs</b>    |                     | p=0.5                  |                                   |                     | p=0.043                |                     | p=0.11                 |                                   |  |
| Median (IQR) <sup>b</sup>            | 17 (15-18)          | 1.05 (0.92, 1.21)      | ..                                | 16 (15-17)          | 0.86 (0.74, 0.99)      | 16 (14-18)          | 0.89 (0.77, 1.03)      | ..                                |  |
| <b>Sex partners last 12m</b>         |                     | p<0.001                | p=0.005                           |                     | p<0.001                |                     | p<0.001                | p<0.001                           |  |
| 1                                    | 13 (7-21)           | reference              | reference                         | 20 (14-27)          | reference              | 11 (5-20)           | reference              | reference                         |  |
| 2-4                                  | 48 (26-70)          | 6.31 (2.17, 18.3)      | 5.10 (1.61, 16.2)                 | 61 (43-78)          | 6.49 (2.83, 14.9)      | 51 (33-70)          | 8.25 (2.98, 22.8)      | 5.96 (3.12, 11.4)                 |  |
| 5+                                   | 57 (17-90)          | 9.06 (2.11, 39.0)      | 7.39 (1.47, 37.2)                 | 56 (17-89)          | 5.11 (1.26, 20.7)      | 55 (5-97)           | 9.35 (1.64, 53.3)      | 4.99 (1.58, 15.7)                 |  |
| <b>Sex frequency last 12m</b>        | Not asked           | Not asked              |                                   |                     | p=0.005                |                     | p=0.08                 |                                   |  |
| 1-2 per year                         | ..                  | ..                     | ..                                | 40 (16-69)          | reference              | 29 (0-97)           | reference              | ..                                |  |
| 1 per month                          | ..                  | ..                     | ..                                | 40 (20-62)          | 1.03 (0.27, 3.93)      | 19 (5-41)           | 1.75 (0.20, 15.6)      | ..                                |  |
| 2-3 per month                        | ..                  | ..                     | ..                                | 43 (26-61)          | 1.13 (0.38, 3.38)      | 30 (13-51)          | 1.82 (0.44, 7.57)      | ..                                |  |
| 1 per week                           | ..                  | ..                     | ..                                | 19 (10-31)          | 0.35 (0.12, 1.03)      | 31 (15-51)          | 1.98 (0.49, 7.99)      | ..                                |  |
| 2-3 per week                         | ..                  | ..                     | ..                                | 12 (5-21)           | 0.2 (0.07, 0.61)       | 17 (5-35)           | 0.87 (0.19, 3.97)      | ..                                |  |
| 4+ per week                          | ..                  | ..                     | ..                                | 36 (17-57)          | 1.03 (0.27, 3.93)      | 18 (1-57)           | 1.75 (0.20, 15.6)      | ..                                |  |
| <b>Partner type last intercourse</b> | Not asked           | Not asked              |                                   |                     | p<0.001                |                     | p<0.001                |                                   |  |
| Stable                               | ..                  | ..                     | ..                                | 20 (15-27)          | reference              | 15 (9-23)           | reference              | ..                                |  |
| Occasional                           | ..                  | ..                     | ..                                | 72 (56-85)          | 10.2 (4.49, 23.1)      | 68 (45-87)          | 12.5 (4.12, 38.0)      | ..                                |  |
| Sex worker                           | ..                  | ..                     | ..                                | 0 (0-0)             | -                      | 0 (0-0)             | -                      | ..                                |  |
| <b>HIV testing</b>                   |                     | p=0.2                  |                                   |                     | p=0.9                  |                     | p=0.2                  |                                   |  |
| Never tested                         | 18 (12-27)          | reference              | ..                                | 28 (17-41)          | reference              | 24 (12-39)          | reference              | ..                                |  |
| Tested >12-m                         | 29 (15-47)          | 1.84 (0.75, 4.52)      | ..                                | 29 (20-38)          | 1.06 (0.50, 2.23)      | 20 (11-32)          | 0.82 (0.31, 2.20)      | ..                                |  |
| Tested in last 12m                   | 37 (15-65)          | 2.64 (0.83, 8.38)      | ..                                | 25 (13-40)          | 0.87 (0.34, 2.22)      | 39 (21-59)          | 2.03 (0.69, 5.95)      | ..                                |  |
| <b>Alcohol</b>                       |                     | p=0.6                  |                                   |                     | p=0.6                  |                     | p=0.074                |                                   |  |
| No use                               | 24 (2-68)           | reference              | ..                                | 24 (10-43)          | reference              | 9 (2-23)            | reference              | ..                                |  |
| Daily                                | 14 (3-36)           | 0.52 (0.06, 4.50)      | ..                                | 13 (1-44)           | 0.46 (0.06, 3.48)      | 26 (1-76)           | 3.3 (0.46, 23.8)       | ..                                |  |
| Weekly                               | 27 (18-38)          | 1.19 (0.19, 7.46)      | ..                                | 30 (22-39)          | 1.39 (0.53, 3.65)      | 32 (22-44)          | 4.54 (1.37, 15.0)      | ..                                |  |
| Monthly                              | 20 (10-34)          | 0.81 (0.12, 5.55)      | ..                                | 25 (14-39)          | 1.08 (0.36, 3.27)      | 19 (8-35)           | 2.25 (0.57, 8.87)      | ..                                |  |
| <b>Tobacco</b>                       |                     | p=0.7                  |                                   |                     | p=0.14                 |                     | p=0.022                |                                   |  |
| Non-smoker                           | 23 (14-34)          | reference              | ..                                | 21 (13-30)          | reference              | 14 (7-24)           | reference              | ..                                |  |
| Casual smoker                        | 33 (10-64)          | 1.66 (0.49, 5.62)      | ..                                | 37 (22-53)          | 2.22 (0.95, 5.21)      | 39 (13-70)          | 3.79 (1.07, 13.5)      | ..                                |  |
| Daily smoker                         | 22 (12-35)          | 0.96 (0.41, 2.24)      | ..                                | 32 (21-43)          | 1.78 (0.85, 3.72)      | 35 (22-49)          | 3.21 (1.29, 7.95)      | ..                                |  |

| <b>Cannabis<sup>c</sup></b>              |            | p=0.5             |    |            | p=0.069           |            | p=0.038           |    |
|------------------------------------------|------------|-------------------|----|------------|-------------------|------------|-------------------|----|
| No use                                   | 19 (10-30) | reference         | .. | 23 (15-34) | reference         | 16 (8-28)  | reference         | .. |
| >12m ago                                 | 24 (14-37) | 1.36 (0.56, 3.31) | .. | 23 (15-34) | 1 (0.47, 2.13)    | 26 (15-39) | 1.82 (0.68, 4.88) | .. |
| Within last 12m                          | 31 (14-53) | 1.92 (0.65, 5.69) | .. | 41 (27-57) | 2.3 (1.04, 5.06)  | 45 (24-67) | 4.27 (1.39, 13.1) | .. |
| <b>Other illicit drugs<sup>c,d</sup></b> |            | p<0.001           |    |            | p=0.2             |            | p=0.6             |    |
| No use                                   | 34 (16-51) | reference         | .. | 25 (18-32) | reference         | 42 (16-32) | reference         | .. |
| Any used                                 | 20 (13-28) | 1.98 (0.80,4.93)  | .. | 35 (20-49) | 1.61 (0.78, 3.34) | 29 (12-46) | 0.48, 3.30)       | .. |

- Multivariable models separate for 2007 and 2012, 2017 because denominator for 2007 excluded women who had never used a condom. Multivariable models include age, number of sex partners and type of partner; p value from Wald test;
- Median age of the proportion who used a condom;
- In 2007 questions about drugs were only asked to people between 15 to 69 years;
- Combines use of ecstasy, cocaine, or heroin and combines categories of use more than 12 months ago and use within last 12 months.

Abbreviations: CI, confidence interval; IQR, interquartile range; m, months; OR, odds ratio; SFr, Swiss Francs; yrs, years; .., variable not included in multivariable model.

Table S9. Lifetime HIV testing, men and women with only opposite-sex partners. Denominators, unweighted and weighted, for each survey and variable, 2007, 2012, 2017

| HIV testing                                       | Men<br>2007     | Men<br>2012   | Men<br>2017   | Women<br>2007 | Women<br>2012 | Women<br>2017 |
|---------------------------------------------------|-----------------|---------------|---------------|---------------|---------------|---------------|
| <b>Totals, N unweighted, weighted<sup>a</sup></b> | 6236, 2237900   | 7063, 2313010 | 7975, 2702130 | 7582, 2289504 | 6763, 2049462 | 8330, 2529129 |
| <b>Age, years</b>                                 |                 |               |               |               |               |               |
| 16-24                                             | 553, 296239     | 949, 290087   | 901, 300476   | 524, 248000   | 843, 255515   | 874, 258899   |
| 25-34                                             | 955, 384253     | 1040, 446058  | 1104, 525416  | 1183, 402818  | 1100, 419164  | 1278, 505920  |
| 35-44                                             | 1506, 505797    | 1402, 465779  | 1436, 525957  | 1753, 521670  | 1511, 471335  | 1604, 509388  |
| 45-54                                             | 1184, 441374    | 1629, 529873  | 1842, 566707  | 1344, 446311  | 1681, 504578  | 1921, 558324  |
| 55-64                                             | 1181, 365700    | 1179, 363623  | 1505, 461133  | 1532, 401480  | 1049, 307860  | 1592, 434936  |
| 65-74                                             | 857, 244536     | 864, 234265   | 1187, 322440  | 1246, 269225  | 579, 173550   | 1061, 290492  |
| <b>Region</b>                                     |                 |               |               |               |               |               |
| Lake Geneva                                       | 1165, 413941    | 1255, 421571  | 1412, 504218  | 1416, 429093  | 1223, 407290  | 1526, 479185  |
| Midland                                           | 1651, 506532    | 1375, 521007  | 1563, 582248  | 2011, 519597  | 1332, 472081  | 1717, 593088  |
| Northwest                                         | 657, 299390     | 984, 312365   | 842, 350702   | 806, 319638   | 944, 291493   | 889, 351691   |
| Zurich                                            | 812, 398380     | 710, 397487   | 873, 485356   | 935, 386575   | 648, 344353   | 915, 443955   |
| East                                              | 711, 334068     | 1067, 356147  | 1510, 385186  | 789, 304118   | 962, 300103   | 1477, 341979  |
| Central                                           | 806, 202729     | 1175, 222817  | 1222, 273641  | 1032, 233854  | 1157, 217857  | 1240, 241036  |
| Ticino                                            | 1165, 413941    | 1255, 421571  | 1412, 504218  | 593, 96630    | 497, 98827    | 566, 107024   |
| <b>Highest education level</b>                    |                 |               |               |               |               |               |
| No school/primary                                 | 613, 255693     | 808, 262368   | 941, 289892   | 1182, 347612  | 857, 275746   | 1019, 288781  |
| Secondary                                         | 3443, 1220851   | 3436, 1132883 | 3756, 1256566 | 5039, 1523082 | 4163, 1283197 | 4726, 1400556 |
| Tertiary                                          | 2179, 761150    | 2803, 930103  | 3264, 1151381 | 1358, 417617  | 1725, 567319  | 2566, 860448  |
| Missing                                           | 1, 206          | 16, 4330      | 14,4291       | 3,1193        | 18, 5740      | 19, 8173      |
| <b>Income, SFr</b>                                |                 |               |               |               |               |               |
| No income                                         | 149, 64349      | 244, 75987    | 342, 111526   | 889, 294891   | 888, 279067   | 963, 271987   |
| <4500                                             | 2134, 789202    | 2253, 759570  | 2660, 910239  | 4367, 1346627 | 3897, 1221547 | 4896, 1466363 |
| 4500-6000                                         | 1520, 523117    | 1648, 549727  | 1881, 649750  | 862, 241467   | 699, 222686   | 1042, 356014  |
| >6000                                             | 1769, 630922    | 2154, 697210  | 2503, 842885  | 407, 109029   | 443, 132703   | 732, 251417   |
| Missing                                           | 664, 230310     | 764, 247191   | 589,187729    | 1057,297489   | 836, 276000   | 697, 212177   |
| <b>Marital status</b>                             |                 |               |               |               |               |               |
| Single                                            | 1790, 702281    | 2230, 829308  | 2397, 991450  | 1776, 572834  | 1751, 585228  | 2247, 795789  |
| Married                                           | 3600, 1323818   | 4208, 1263895 | 4859, 1430224 | 4065, 1353870 | 4226, 1262541 | 5024, 1414870 |
| Widowed                                           | 149, 31389      | 80, 27635     | 70, 24647     | 684, 122382   | 126, 40937    | 206, 59874    |
| Divorced                                          | 695, 179067     | 543, 208182   | 649, 255809   | 1054, 239916  | 658, 241865   | 853, 287426   |
| Missing                                           | 2, 1347         | 2,664         | 0,0           | 3,502         | 2, 1431       | 0,0           |
| <b>Sex partners last 12m</b>                      |                 |               |               |               |               |               |
| 1                                                 | 4883, 1793871   | 6086, 2005936 | 6437, 2140357 | 5811, 1908525 | 6331, 1924121 | 6876,1924121  |
| 2-4                                               | 666, 242075     | 712, 236900   | 660, 254133   | 404, 123338   | 384, 118102   | 488,118102    |
| 5+                                                | 200, 76497      | 221, 74953    | 197, 78844    | 34, 10340     | 29, 8387      | 29,8387       |
| Missing                                           | 487, 106440     | 44,11896      | 681, 228796   | 1333, 110513  | 19, 6301      | 1053, 320588  |
| <b>Condom use last intercourse</b>                |                 |               |               |               |               |               |
| Used                                              | 3936, 1244522   | 5424, 1772851 | 6027, 1758067 | 4519, 1057221 | 5567, 1688823 | 6710, 1997371 |
| Not used                                          | 1270, 654750    | 1630, 553994  | 1934, 552103  | 1141, 726368  | 1188, 365366  | 1603, 526907  |
| Missing                                           | 1030, 338630    | 9, 2838       | 15, 4156      | 3234, 505916  | 8, 2721       | 1209, 4850    |
| <b>Alcohol</b>                                    |                 |               |               |               |               |               |
| No use                                            | 504, 182855     | 557, 208127   | 802, 280558   | 1370, 404354  | 1082, 329781  | 1504, 461747  |
| Daily                                             | 1329, 415464    | 1185, 354083  | 1161, 348790  | 747, 195648   | 526, 146025   | 516, 142503   |
| Weekly                                            | 3301, 1, 235, 3 | 4002, 1310690 | 4589, 1571742 | 2905, 921169  | 3032, 926154  | 3924, 1215081 |
| Monthly                                           | 1097, 401590    | 1318, 456511  | 1421, 500330  | 2558, 767830  | 2122, 654757  | 2385, 500330  |
| Missing                                           | 5, 2653         | 1,273         | 2, 711        | 2, 504        | 1, 93         | 1,182         |



|                                          |               |               |               |               |               |               |
|------------------------------------------|---------------|---------------|---------------|---------------|---------------|---------------|
| <b>Tobacco</b>                           |               |               |               |               |               |               |
| Non-smoker                               | 4122, 1465671 | 4675, 1512349 | 5437, 1791473 | 5614, 1703513 | 4994, 1512349 | 6243, 1896416 |
| Casual smoker                            | 599, 216270   | 694, 233922   | 768, 285872   | 227, 145214   | 463, 233922   | 596, 193855   |
| Daily smoker                             | 1515, 555960  | 1693, 582120  | 1770, 624782  | 622, 440333   | 1306, 582120  | 1490, 465636  |
| Missing                                  | 0, 0          | 1, 1293       | 0,0           | 2, 444        | 0, 0          | 1,222         |
| <b>Cannabis<sup>b</sup></b>              |               |               |               |               |               |               |
| No use                                   | 4203, 1509223 | 4808, 1540934 | 5492, 1753661 | 5797, 1778908 | 5406, 1540934 | 6460, 1887252 |
| Any use                                  | 1612, 614244  | 1985, 702051  | 2453, 936771  | 1184, 384976  | 1133, 702051  | 1857, 638014  |
| Missing                                  | 421, 114433   | 270, 86968    | 30, 11698     | 588, 125620   | 224, 65444    | 13, 3863      |
| <b>Other illicit drugs<sup>b,c</sup></b> |               |               |               |               |               |               |
| No use                                   | 5520, 2020619 | 6663, 2185257 | 7400, 2459983 | 6821, 2113861 | 6549, 2185257 | 8026, 2416588 |
| Any use                                  | 313, 107355   | 393, 141195   | 562, 236133   | 173, 54604    | 212, 141195   | 300, 111683   |
| Missing                                  | 403, 109927   | 7, 3231       | 13, 6013      | 588,121040    | 2, 371        | 4, 858        |

a. Overall denominators for condom use and HIV testing differ because eligibility criteria for answering each question differed;

b. In 2007 questions about drugs were only asked to people between 15 to 69 years;

c. Combines use of ecstasy, cocaine, or heroin

Abbreviations: m, months; SFr, Swiss Francs; yrs, years

Table S10. Lifetime HIV testing, men and women with only opposite-sex partners. Univariable logistic regression, 2012 and 2017

|                                    | Men 2007                               | Men 2012                               | Men 2017                               | Women 2007                             | Women 2012                             | Women 2017                             |
|------------------------------------|----------------------------------------|----------------------------------------|----------------------------------------|----------------------------------------|----------------------------------------|----------------------------------------|
| HIV Testing                        | Unadjusted OR <sup>a</sup><br>(95% CI) | Unadjusted OR <sup>a</sup><br>(95% CI) | Unadjusted OR <sup>a</sup><br>(95% CI) | Unadjusted OR <sup>a</sup><br>(95% CI) | Unadjusted OR <sup>a</sup><br>(95% CI) | Unadjusted OR <sup>a</sup><br>(95% CI) |
| <b>Age, years</b>                  | p<0.001                                | p<0.001                                | p<0.001                                | p<0.001                                | p<0.001                                | p<0.001                                |
|                                    | 0.98 (0.99, 1.00)                      | 0.98(0.99,1.00)                        | 0.98(0.99,1.00)                        | 0.96 (0.95, 0.96)                      | 0.97 (0.97, 0.97)                      | 0.98 (0.97, 0.98)                      |
| <b>Region</b>                      | p<0.001                                | p<0.001                                | p<0.001                                | p<0.001                                | p<0.001                                | p<0.001                                |
| Lake Geneva                        | reference                              | reference                              | reference                              | reference                              | reference                              | reference                              |
| Midland                            | 0.51 (0.42, 0.62)                      | 0.5 (0.41, 0.60)                       | 0.59 (0.50, 0.69)                      | 0.65 (0.55,0.78)                       | 0.55 (0.46, 0.66)                      | 0.54 (0.46, 0.63)                      |
| Northwest                          | 0.58 (0.46, 0.73)                      | 0.52 (0.42, 0.63)                      | 0.58 (0.48, 0.70)                      | 0.51 (0.42,0.64)                       | 0.5 (0.41, 0.61)                       | 0.58 (0.48, 0.69)                      |
| Zurich                             | 0.69 (0.56, 0.85)                      | 0.79 (0.64, 0.98)                      | 0.76 (0.63, 0.91)                      | 0.71 (0.58,0.86)                       | 0.63 (0.51, 0.78)                      | 0.67 (0.56, 0.80)                      |
| East                               | 0.39 (0.30, 0.50)                      | 0.46 (0.37, 0.58)                      | 0.52 (0.44, 0.61)                      | 0.4 (0.32, 0.51)                       | 0.47 (0.38, 0.59)                      | 0.41 (0.34, 0.48)                      |
| Central                            | 0.59 (0.46, 0.75)                      | 0.45 (0.37, 0.56)                      | 0.51 (0.42, 0.62)                      | 0.45 (0.37,0.56)                       | 0.44 (0.36, 0.53)                      | 0.37 (0.30, 0.45)                      |
| Ticino                             | 0.62 (0.47, 0.81)                      | 0.78 (0.61, 0.99)                      | 0.63 (0.51, 0.79)                      | 0.58 (0.46,0.73)                       | 0.63 (0.49, 0.79)                      | 0.58 (0.47, 0.71)                      |
| <b>Highest educational level</b>   | p<0.001                                | p<0.001                                | p<0.001                                | p<0.001                                | p<0.001                                | p<0.001                                |
| No school/primary                  | reference                              | reference                              | reference                              | reference                              | reference                              | reference                              |
| Secondary                          | 1.55 (1.20, 2.02)                      | 1.69 (1.35, 2.11)                      | 1.49 (1.25, 1.79)                      | 2.18 (1.78,2.67)                       | 2.09 (1.69, 2.58)                      | 1.63 (1.37, 1.93)                      |
| Tertiary                           | 2.46 (1.89, 3.21)                      | 2.18 (1.74, 2.72)                      | 2.34 (1.95, 2.80)                      | 4.52 (3.59,5.70)                       | 4.05 (3.21, 5.11)                      | 3.31 (2.76, 3.96)                      |
| <b>Income, SFr</b>                 | p<0.001                                | p<0.001                                | p<0.001                                | p<0.001                                | p<0.001                                | p<0.001                                |
| No Income                          | 0.65 (0.39, 1.07)                      | 0.66 (0.45, 0.97)                      | 1.25 (0.96, 1.64)                      | 0.87 (0.72,1.04)                       | 0.91 (0.76, 1.09)                      | 0.96 (0.81, 1.13)                      |
| <4500                              | reference                              | reference                              | reference                              | reference                              | reference                              | reference                              |
| 4500-6000                          | 1.28 (1.07, 1.54)                      | 1.17 (0.98, 1.39)                      | 1.21 (1.05, 1.41)                      | 1.82 (1.51,2.19)                       | 1.65 (1.34, 2.03)                      | 1.88 (1.60, 2.21)                      |
| >6000                              | 1.52 (1.28, 1.79)                      | 1.33 (1.13, 1.55)                      | 1.66 (1.45, 1.89)                      | 2.39 (1.84,3.10)                       | 1.89 (1.47, 2.43)                      | 2.34 (1.93, 2.85)                      |
| <b>Marital Status</b>              | p<0.001                                | p<0.001                                | p<0.001                                | p<0.001                                | p<0.001                                | p<0.001                                |
| Single                             | 1.70 (1.47, 1.98)                      | 1.5 (1.31, 1.72)                       | 1.43 (1.27, 1.61)                      | 1.82 (1.58,2.11)                       | 1.5 (1.31, 1.73)                       | 1.65 (1.46, 1.86)                      |
| Married                            | reference                              | reference                              | reference                              | reference                              | reference                              | reference                              |
| Widowed                            | 0.65 (0.34, 1.22)                      | 1.17 (0.66, 2.08)                      | 1.17 (0.65, 2.10)                      | 0.43 (0.31,0.60)                       | 0.76 (0.46, 1.24)                      | 0.58 (0.41, 0.81)                      |
| Divorced                           | 2.91 (2.33, 3.64)                      | 2.27 (1.76, 2.92)                      | 2.41 (1.97, 2.94)                      | 1.98 (1.66,2.38)                       | 2.51 (1.99, 3.15)                      | 2.33 (1.96, 2.78)                      |
| <b>Age first intercourse, yrs</b>  | p<0.001                                | p<0.001                                | p<0.001                                | p<0.001                                | p<0.001                                | p<0.001                                |
|                                    | 0.90 (0.88, 0.93)                      | 0.91 (0.89, 0.93)                      | 0.97 (0.96, 0.98)                      | 0.88 (0.86,0.90)                       | 0.88 (0.85, 0.90)                      | 0.95 (0.93, 0.98)                      |
| <b>Sex partners last 12m</b>       | p<0.001                                | p<0.001                                | p<0.001                                | p<0.001                                | p<0.001                                | p<0.001                                |
| 1                                  | reference                              | reference                              | reference                              | reference                              | reference                              | reference                              |
| 2-4                                | 1.94 (0.85, 4.42)                      | 1.24 (1.00, 1.55)                      | 1.46 (1.20, 1.77)                      | 1.69 (1.31,2.19)                       | 1.56 (1.20, 2.02)                      | 2.06 (1.60, 2.67)                      |
| 5+                                 | 5.83 (2.07, 16.4)                      | 1.67 (1.16, 2.41)                      | 1.63 (1.16, 2.30)                      | 1.18 (0.51,2.72)                       | 2.12 (0.81, 5.54)                      | 2.71 (1.01, 7.30)                      |
| <b>Condom use last intercourse</b> | p=0.2                                  | p=0.8                                  | p=0.3                                  | p=0.3                                  | p= 0.8                                 | p= 0.051                               |
| Used                               | reference                              | reference                              | reference                              | reference                              | reference                              | reference                              |
| Not used                           | 0.90 (0.76, 1.06)                      | 0.98 (0.84, 1.14)                      | 1.07 (0.94, 1.21)                      | 1.08 (0.92,1.28)                       | 1.02 (0.87, 1.20)                      | 1.14 (1.00, 1.29)                      |
| <b>Alcohol</b>                     | p=0.13                                 | p=0.8                                  | p<0.001                                | p<0.001                                | p<0.001                                | p<0.001                                |
| Abstinent                          | reference                              | reference                              | reference                              | reference                              | reference                              | reference                              |
| Daily                              | 1.01 (0.75, 1.35)                      | 0.96 (0.73, 1.25)                      | 0.88 (0.71, 1.10)                      | 0.62 (0.48,0.80)                       | 0.75 (0.58, 0.98)                      | 0.72 (0.57, 0.92)                      |
| Weekly                             | 1.21 (0.92, 1.57)                      | 1.02 (0.80, 1.29)                      | 1.27 (1.06, 1.53)                      | 1.27 (1.07,1.50)                       | 1.05 (0.88, 1.25)                      | 1.41 (1.23, 1.63)                      |
| Monthly                            | 1.07 (0.79, 1.43)                      | 1.06 (0.81, 1.39)                      | 1.24 (1.01, 1.53)                      | 1.03 (0.86,1.22)                       | 0.95 (0.79, 1.14)                      | 1.16 (1.00, 1.36)                      |
| <b>Tobacco</b>                     | p<0.001                                | p<0.001                                | p=0.03                                 | p<0.001                                | p<0.001                                | p<0.001                                |
| Non-smoker                         | reference                              | reference                              | reference                              | reference                              | reference                              | reference                              |
| Casual smoker                      | 1.52 (1.22, 1.89)                      | 1.28 (1.03, 1.59)                      | 1.29 (1.08, 1.56)                      | 1.3 (1.01, 1.66)                       | 1.65 (1.30, 2.08)                      | 1.42 (1.17, 1.73)                      |
| Daily smoker                       | 1.61 (1.38, 1.88)                      | 1.38 (1.19, 1.59)                      | 1.18 (1.04, 1.34)                      | 1.48 (1.27,1.71)                       | 1.46 (1.25, 1.71)                      | 1.49 (1.31, 1.71)                      |
| <b>Cannabis<sup>b</sup></b>        | p<0.001                                | p<0.001                                | p<0.001                                | p<0.001                                | p<0.001                                | p<0.001                                |
| No use                             | reference                              | reference                              | reference                              | reference                              | reference                              | reference                              |

|                                          |                   |                   |                   |                  |                   |                   |
|------------------------------------------|-------------------|-------------------|-------------------|------------------|-------------------|-------------------|
| Any use                                  | 2.46 (2.12, 2.86) | 2.36 (2.06, 2.71) | 2.22 (1.98, 2.50) | 3.34 (2.84,3.93) | 2.93 (2.47, 3.47) | 5.33 (3.48, 8.14) |
| <b>Other illicit drugs<sup>b,c</sup></b> | p<0.001           | p<0.001           | p<0.001           | p<0.001          | p<0.001           | p<0.001           |
| No use                                   | reference         | reference         | reference         | reference        | reference         | reference         |
| Any use                                  | 4.62 (3.41, 6.27) | 2.78 (2.09, 3.69) | 2.60 (2.10, 3.23) | 6.55 (4.33,9.91) | 2.87 (2.52, 3.27) | 5.02 (3.54, 7.14) |

a. p value from Wald test;

b. In 2007 questions about drugs were only asked to people between 15 to 69 years;

c. Combines use of ecstasy, cocaine, or heroin and combines categories of use more than 12 months ago and use within last 12 months.

Abbreviations: CI, confidence interval; m, months; OR, odds ratio; SFr, Swiss Francs; yrs, years;

*Table S11. HIV testing in the last 12 months, men and women reporting only opposite-sex partners and men reporting any same-sex partner 2012, 2017.*

| HIV testing in the last 12 months | Men reporting only opposite-sex partners |                               | Women reporting only opposite-sex partners |                               | Men reporting any same-sex partner |                               |
|-----------------------------------|------------------------------------------|-------------------------------|--------------------------------------------|-------------------------------|------------------------------------|-------------------------------|
|                                   | 2012<br>Prevalence % (95% CI)            | 2017<br>Prevalence % (95% CI) | 2012<br>Prevalence % (95% CI)              | 2017<br>Prevalence % (95% CI) | 2012<br>Prevalence % (95% CI)      | 2017<br>Prevalence % (95% CI) |
| Total                             | 7 (6-8)                                  | 7 (7-8)                       | 9 (8-10)                                   | 8 (7-9)                       | 30 (14-38)                         | 39 (30-47)                    |
| <b>Age, years</b>                 |                                          |                               |                                            |                               |                                    |                               |
| 16-24                             | 14 (11-18)                               | 18 (15-21)                    | 16 (13-19)                                 | 16 (13-19)                    | 35 (11-70)                         | 35 (17-59)                    |
| 25-34                             | 10 (8-13)                                | 10 (8-12)                     | 18 (15-20)                                 | 16 (13-18)                    | 41 (23-62)                         | 60 (39-79)                    |
| 35-44                             | 7 (6-9)                                  | 8 (6-10)                      | 10 (8-12)                                  | 9 (7-11)                      | 32 (19-48)                         | 35 (19-55)                    |
| 45-54                             | 6 (5-8)                                  | 5 (4-6)                       | 4 (3-5)                                    | 4 (3-5)                       | 27 (14-45)                         | 44 (26-63)                    |
| 55-64                             | 3 (2-4)                                  | 4 (3-5)                       | 2 (1-4)                                    | 3 (2-4)                       | 26 (11-50)                         | 19 (9-37)                     |
| 65-74                             | 4 (2-5)                                  | 2 (1-3)                       | 1 (0-3)                                    | 1 (1-2)                       | 12 (2-49)                          | -                             |
| <b>Number of partners</b>         |                                          |                               |                                            |                               |                                    |                               |
| 1                                 | 5 (5-6)                                  | 5 (5-6)                       | 8 (7-8)                                    | 7 (6-8)                       | 20 (12-30)                         | 31 (21-44)                    |
| 2-4                               | 17 (13-21)                               | 18 (15-22)                    | 28 (23-34)                                 | 31 (26-37)                    | 42 (22-63)                         | 48 (29-67)                    |
| 5+                                | 30 (21-40)                               | 28 (21-36)                    | 41 (20-65)                                 | 33 (16-56)                    | 61 (37-82)                         | 50 (31-69)                    |

Table S12. Lifetime HIV testing, men and women with any same-sex partners. Denominators, unweighted and weighted, and number of missing values for each survey and variable, 2007, 2012, 2017

| HIV Testing                                       | Men<br>2007 | Men<br>2012 | Men<br>2017 | Women<br>2007 | Women<br>2012 | Women<br>2017 |
|---------------------------------------------------|-------------|-------------|-------------|---------------|---------------|---------------|
| <b>Totals, N unweighted, weighted<sup>a</sup></b> | 187, 64684  | 237, 81464  | 178,74070   | 216, 67259    | 289, 92734    | 172, 69018    |
| <b>Age, years</b>                                 |             |             |             |               |               |               |
| 16-24                                             | 7, 3497     | 20, 5643    | 25, 8197    | 20, 10605     | 54, 15237     | 14084, 8197   |
| 25-34                                             | 43, 17370   | 33, 14174   | 32, 17291   | 48, 17530     | 79, 30848     | 25382, 17291  |
| 35-44                                             | 58, 19554   | 68, 27822   | 38, 18051   | 64, 15196     | 62, 19610     | 12090, 18051  |
| 45-54                                             | 36, 11628   | 59, 18085   | 36, 14631   | 56, 18019     | 61, 17425     | 12713, 14631  |
| 55-64                                             | 31, 9701    | 38, 11063   | 37, 13623   | 22, 4563      | 23, 6537      | 3117, 13623   |
| 65-74                                             | 12, 2935    | 19, 4678    | 10, 2277    | 6, 1344       | 10, 3077      | 1631, 2277    |
| <b>Region</b>                                     |             |             |             |               |               |               |
| Lake Geneva                                       | 29, 10,828  | 43, 14665   | 44, 18486   | 53, 13946     | 61, 19001     | 43, 16336     |
| Midland                                           | 52, 17386   | 35, 15606   | 17, 8466    | 45, 11739     | 52, 17968     | 38, 18342     |
| Northwest                                         | 17, 6329    | 43, 10864   | 19, 10322   | 34, 12394     | 56, 17660     | 16, 6521      |
| Zurich                                            | 45, 18480   | 49, 24087   | 37, 19055   | 44, 17850     | 40, 21183     | 26, 14769     |
| East                                              | 18, 5623    | 27, 9230    | 27, 10121   | 17, 5344      | 29, 7467      | 20, 6475      |
| Central                                           | 14, 3722    | 34, 5939    | 26, 5903    | 19, 5549      | 36, 6356      | 20, 4442      |
| Ticino                                            | 12, 2317    | 6, 1073     | 8, 1718     | 4, 437        | 15, 3100      | 9, 2133       |
| <b>Highest educational level</b>                  |             |             |             |               |               |               |
| No school/ primary                                | 8, 3259     | 19, 4915    | 15, 4467    | 10, 2791      | 27, 8459      | 17, 5036      |
| Secondary                                         | 98, 30528   | 106, 37877  | 80, 31484   | 131, 43428    | 152, 51662    | 83, 33636     |
| Tertiary                                          | 81, 30897   | 112, 38672  | 83, 38119   | 75, 21040     | 110, 32612    | 72, 30346     |
| Missing                                           | 0, 0        | 0, 0        | 0, 0        | 0, 0          | 0, 0          | 0, 0          |
| <b>Income, SFr</b>                                |             |             |             |               |               |               |
| No Income                                         | 5, 2205     | 9, 2488     | 12, 3984    | 14, 5575      | 19, 6716      | 8, 2581       |
| <4500                                             | 66, 24662   | 64, 20121   | 62, 26067   | 121, 38545    | 178, 57005    | 106, 44156    |
| 4500-6000                                         | 51, 16664   | 49, 16453   | 42, 17768   | 42, 12900     | 37, 11380     | 31, 10373     |
| >6000                                             | 51, 17320   | 732, 31517  | 50, 20141   | 24, 5869      | 29, 9141      | 22, 9965      |
| Missing                                           | 14, 3833    | 32, 10885   | 12, 6110    | 15, 4370      | 26, 8492      | 5, 1943       |
| <b>Marital status</b>                             |             |             |             |               |               |               |
| Single                                            | 119, 41500  | 118, 45409  | 120, 52194  | 117, 35396    | 147, 48911    | 111, 47453    |
| Married                                           | 41, 14123   | 96, 26288   | 18, 5042    | 47, 18229     | 99, 27702     | 22, 7883      |
| Widowed                                           | 0, 0        | 1, 178      | 0, 0        | 4, 839        | 5, 1679       | 2, 428        |
| Divorced                                          | 26, 7948    | 22, 9589    | 13, 5267    | 48, 12795     | 37, 13873     | 14, 5518      |
| Missing                                           | 1, 1113     | 0, 0        | 27, 11566   | 0, 0          | 1, 569        | 23, 7735      |
| <b>Sex partners last 12m</b>                      |             |             |             |               |               |               |
| 1                                                 | 78, 28188   | 158,51901   | 86,34681    | 136, 45498    | 3367, 75583   | 106, 44848    |
| 2-4                                               | 62, 21451   | 44,17482    | 40,19451    | 36, 10840     | 253, 13385    | 41, 16743     |
| 5+                                                | 26, 10147   | 30,10335    | 37,14688    | 12, 3257      | 23, 3767      | 7, 3005       |
| Missing                                           | 8, 4889     | 5, 1747     | 15, 5250    | 32, 7664      | 0, 0          | 18, 4422      |
| <b>Condom use last intercourse</b>                |             |             |             |               |               |               |
| Used                                              | 95, 35009   | 150,53233   | 91,34347    | 144, 46564    | 213, 66891    | 129, 51731    |
| Not used                                          | 80, 26642   | 86,27692    | 87,39903    | 51, 14040     | 76, 25843     | 43, 17287     |
| Missing                                           | 8, 3033     | 1, 539      | 0, 0        | 21, 6656      | 0, 0          | 0, 0          |
| <b>Alcohol</b>                                    |             |             |             |               |               |               |
| No use                                            | 17, 4041    | 28, 8021    | 12, 4354    | 20, 7383      | 32, 10546     | 225, 72098    |
| Daily                                             | 37, 14060   | 36, 12419   | 28, 9542    | 23, 6067      | 24, 7291      | 64, 20636     |
| Weekly                                            | 96, 31944   | 132, 46296  | 99, 44739   | 114, 35551    | 155, 48066    | 225, 72098    |
| Monthly                                           | 37, 14638   | 41, 14729   | 39, 15436   | 58, 18006     | 78, 26831     | 64, 20636     |
| Missing                                           | 0, 0        | 0, 0        | 0, 0        | 1,            | 0, 0          | 0, 0          |
| <b>Tobacco</b>                                    |             |             |             |               |               |               |
| Non-smoker                                        | 102, 37373  | 137, 46754  | 103, 43499  | 102,37373     | 139, 47724    | 84, 34367     |

|                                           |             |            |            |           |             |            |
|-------------------------------------------|-------------|------------|------------|-----------|-------------|------------|
| Casual smoker                             | 25, 7274    | 30, 11727  | 18, 5952   | 25,7274   | 50, 16277   | 19, 7859   |
| Daily smoker                              | 60, 20037   | 70, 22983  | 57, 24620  | 60,20037  | 100, 28733  | 69, 26792  |
| Missing                                   | 0, 0        | 0, 0       | 0, 0       | 0, 0      | 0, 0        | 0, 0       |
| <b>Cannabis<sup>b</sup></b>               |             |            |            |           |             |            |
| No use                                    | 90, 26874   | 125, 40575 | 91, 37982  | 91, 27166 | 86, 28336   | 74, 28862  |
| Any use                                   | 90, 35547   | 110, 39979 | 85, 34967  | 89, 27750 | 203, 64398  | 96, 39422  |
| Missing                                   | 7, 2264     | 2, 910     | 2, 1121    | 3, 1547   | 0, 0        | 2,734      |
| <b>Other illicit drugs<sup>b, c</sup></b> |             |            |            |           |             |            |
| No use                                    | 138, 46,062 | 178, 57781 | 144, 60100 | 138,52314 | 225, 72,098 | 136, 53648 |
| Any use                                   | 43, 16,637  | 54, 22233  | 34, 13970  | 43,14945  | 64, 20,636  | 36, 15370  |
| Missing                                   | 6, 19860    | 5, 1543    | 0, 0       | 0, 0      | 0, 0        | 0, 0       |

a. Overall denominators for condom use and HIV testing differ because eligibility criteria for answering each question differed;

b. In 2007 questions about drugs were only asked to people between 15 to 69 years;

c. Combines use of ecstasy, cocaine, or heroin

Abbreviations: m, months; SFr, Swiss Francs; yrs, years

Table S13. Lifetime HIV testing, men reporting any same-sex partner. Associations with sociodemographic factors, sexual behaviours and substance use from univariable logistic regression, 2007, 2012, 2017

| HIV testing                                | 2007                                | 2012                                | 2017                                |
|--------------------------------------------|-------------------------------------|-------------------------------------|-------------------------------------|
|                                            | Unadjusted OR (95% CI) <sup>a</sup> | Unadjusted OR (95% CI) <sup>a</sup> | Unadjusted OR (95% CI) <sup>a</sup> |
| <b>Age</b>                                 | p=0.072                             | p=0.3                               | p=0.9                               |
| <b>Per year increase</b>                   | 0.97 (0.94, 1.00)                   | 0.98 (0.93, 1.02)                   | 1.00 (0.97, 1.04)                   |
| <b>Region</b>                              | p=0.2                               | p=0.049                             | p<0.001                             |
| Lake Geneva                                | reference                           | reference                           | reference                           |
| Midland                                    | 0.71 (0.21, 2.37)                   | 0.91 (0.28, 3.03)                   | 0.66 (0.12, 3.78)                   |
| Northwest                                  | 1.81 (0.35, 9.48)                   | 0.46 (0.12, 1.75)                   | 0.47 (0.11, 1.91)                   |
| Zurich                                     | 1.16 (0.33, 4.11)                   | 2.93 (0.75, 11.5)                   | 1.82 (0.47, 7.07)                   |
| East                                       | 0.24 (0.05, 1.03)                   | 0.3 (0.08, 1.07)                    | 0.57 (0.15, 2.15)                   |
| Central                                    | 1.8 (0.23, 14.2)                    | 0.46 (0.13, 1.62)                   | 0.39 (0.11, 1.41)                   |
| Ticino                                     | 2.42 (0.37, 15.7)                   | 0.40 (0.06, 2.83)                   | -                                   |
| <b>Education level</b>                     | p=0.8                               | p=0.01                              | p=0.10                              |
| No school/primary                          | reference                           | reference                           | reference                           |
| Secondary                                  | 0.86 (0.12, 6.06)                   | 0.63 (0.16, 2.41)                   | 0.63 (0.16, 2.41)                   |
| Tertiary                                   | 1.11 (0.16, 7.73)                   | 1.84 (0.43, 7.89)                   | 1.84 (0.43, 7.89)                   |
| <b>Income, SFr</b>                         | p=0.6                               | p=0.14                              | p=0.011                             |
| No Income                                  | 0.69 (0.08, 6.37)                   | 1.15 (0.22, 5.94)                   | 0.66 (0.16, 2.64)                   |
| <4500                                      | reference                           | reference                           | reference                           |
| 4500-6000                                  | 0.79 (0.28, 2.25)                   | 2.91 (1.02, 8.31)                   | 3.85 (1.20, 12.4)                   |
| >6000                                      | 0.50 (0.18, 1.40)                   | 2.48 (0.95, 6.47)                   | 4.2 (1.29, 13.7)                    |
| <b>Marital Status</b>                      | p=0.001                             | p<0.001                             | p=0.8                               |
| Single                                     | 4.51 (1.84, 11.1)                   | 2.15 (0.96, 4.81)                   | 0.95 (0.26, 3.42)                   |
| Married                                    | reference                           | reference                           | reference                           |
| Widowed                                    | -                                   | -                                   | -                                   |
| Divorced                                   | 7.34 (1.88, 28.7)                   | 0.83 (0.19, 3.61)                   | 1.58 (0.26, 9.49)                   |
| <b>Age first sexual intercourse, years</b> | p= 0.038                            | p= 0.9                              | p= 0.5                              |
| <b>Median (IQR)</b>                        | 0.87 (0.76, 0.99)                   | 0.99 (0.88, 1.11)                   | 0.97 (0.89, 1.06)                   |
| <b>Sex partners 12m</b>                    | p<0.001                             | p=0.6                               | p=0.3                               |
| 1                                          | reference                           | reference                           | reference                           |
| 2-4                                        | 1.26 (0.50, 3.18)                   | 1.40 (0.53, 3.70)                   | 2.29 (0.75, 6.96)                   |
| 5+                                         | 27.1 (4.99, 147)                    | 2.43 (0.38, 15.7)                   | 0.98 (0.29, 3.39)                   |
| <b>Condom use last intercourse</b>         | p=0.072                             | p=0.2                               | p=0.8                               |
| Used                                       | reference                           | reference                           | reference                           |
| Not used                                   | 2.18 (0.93, 5.12)                   | 1.95 (0.78, 4.89)                   | 0.87 (0.37, 2.08)                   |
| <b>Alcohol</b>                             | p=0.061                             | p=0.090                             | p=0.11                              |
| No use                                     | reference                           | reference                           | reference                           |
| Daily                                      | 0.09 (0.01, 0.56)                   | 1.37 (0.31, 6.13)                   | 1.27 (0.26, 6.18)                   |
| Weekly                                     | 0.19 (0.03, 1.11)                   | 3.16 (1.04, 9.63)                   | 2.66 (0.63, 11.2)                   |
| Monthly                                    | 0.13 (0.02, 0.88)                   | 3.52 (0.93, 13.3)                   | 5.64 (1.04, 30.7)                   |
| <b>Tobacco</b>                             | p=0.3                               | p=0.2                               | p=0.68                              |
| Non-smoker                                 | reference                           | reference                           | reference                           |
| Casual smoker                              | 0.69 (0.23, 2.12)                   | 0.55 (0.18, 1.72)                   | 1.03 (0.29, 3.57)                   |
| Daily smoker                               | 1.80 (0.67, 4.84)                   | 1.71 (0.71, 4.09)                   | 3.24 (1.16, 9.08)                   |
| <b>Cannabis</b>                            | p=0.023                             | p=0.010                             | p=0.9                               |
| No use                                     | reference                           | reference                           | reference                           |
| Any use                                    | 3.22 (1.36, 7.63)                   | 3.86 (1.37, 10.8)                   | 0.94 (0.39, 2.26)                   |
| <b>Other illicit drugs<sup>b</sup></b>     | p=0.019                             | p= 0.002                            | p=0.7                               |
| No use                                     | reference                           | reference                           | reference                           |
| Any use                                    | 4.86 (1.28, 18.4)                   | 4.36 (1.67, 11.4)                   | 1.35 (0.32, 5.70)                   |

a. p value from Wald test;

b. In 2007 questions about drugs were only asked to people between 15 to 69 years;

c. Combines use of ecstasy, cocaine, or heroin and combines categories of use more than 12 months ago and use within last 12 months.

Abbreviations: CI, confidence interval; m, months; OR, odds ratio; SFr, Swiss Francs; yrs, years;

Table S14. Lifetime HIV testing, women reporting any same-sex partner. Associations with sociodemographic factors, sexual behaviours and substance use from univariable logistic regression, 2007, 2012, 2017

| HIV testing                                | 2007                |                        | 2012                |                        | 2017                |                        | Adjusted OR (95% CI) <sup>a</sup> |
|--------------------------------------------|---------------------|------------------------|---------------------|------------------------|---------------------|------------------------|-----------------------------------|
|                                            | Prevalence (95% CI) | Unadjusted OR (95% CI) | Prevalence (95% CI) | Unadjusted OR (95% CI) | Prevalence (95% CI) | Unadjusted OR (95% CI) |                                   |
| <b>Year</b>                                |                     |                        |                     |                        |                     |                        | p=0.5                             |
| 2007                                       |                     |                        |                     |                        |                     |                        | reference                         |
| 2012                                       |                     |                        |                     |                        |                     |                        | 1.35 (0.82, 2.23)                 |
| 2017                                       |                     |                        |                     |                        |                     |                        | 1.31 (0.74, 2.30)                 |
| <b>Age</b>                                 |                     | p=0.020                |                     | p=0.7                  |                     | p=0.8                  | p=0.9                             |
| Median age (years) (IQR)                   | 36 (26-45)          | 0.96 (0.93, 0.99)      | 34(29-45)           | 0.99 (0.97, 1.02)      | 33 (26-44)          | 1.01 (0.97, 1.04)      | 1 (0.98, 1.02)                    |
| 16-24                                      | 70 (38-90)          | -                      | 48 (32-65)          | -                      | 59 (37-77)          | -                      | -                                 |
| 25-34                                      | 70 (54-83)          | -                      | 82 (69-90)          | -                      | 67 (51-80)          | -                      | -                                 |
| 35-44                                      | 71 (55-83)          | -                      | 79 (64-89)          | -                      | 88 (68-96)          | -                      | -                                 |
| 45-54                                      | 51 (33-68)          | -                      | 68 (52-81)          | -                      | 75 (55-88)          | -                      | -                                 |
| 55-64                                      | 25 (09-54)          | -                      | 63 (31-87)          | -                      | 45 (05-93)          | -                      | -                                 |
| <b>Region</b>                              |                     |                        |                     | p=0.5                  |                     | p=0.3                  |                                   |
| Lake Geneva                                | 60 (43-76)          | reference              | 68 (52-80)          | reference              | 71 (53-84)          | reference              | ..                                |
| Midland                                    | 64 (45-80)          | 1.14 (0.41, 3.21)      | 77 (59-88)          | 1.58 (0.57, 4.41)      | 64 (46-80)          | 0.74 (0.26, 2.12)      | ..                                |
| Northwest                                  | 63 (40-82)          | 1.1 (0.35, 3.41)       | 57 (41-72)          | 0.64 (0.26, 1.58)      | 56 (28-81)          | 0.53 (0.14, 2.01)      | ..                                |
| Zurich                                     | 54 (35-72)          | 0.77 (0.28, 2.09)      | 71 (52-85)          | 1.18 (0.42, 3.31)      | 80 (55-93)          | 1.69 (0.43, 6.57)      | ..                                |
| East                                       | 73 (38-94)          | 1.73 (0.37, 8.12)      | 79 (52-93)          | 1.79 (0.46, 6.94)      | 62 (29-87)          | 0.68 (0.15, 2.99)      | ..                                |
| Central                                    | 67 (29-93)          | 1.31 (0.26, 6.57)      | 78 (59-89)          | 1.66 (0.57, 4.84)      | 81 (55-94)          | 1.74 (0.45, 6.77)      | ..                                |
| Ticino                                     | 43 (0-100)          | 0.48 (0.04, 5.85)      | 75 (41-93)          | 1.43 (0.32, 6.37)      | 37(10-76)           | 0.24 (0.05, 1.22)      | ..                                |
| <b>Education level</b>                     |                     | p=0.2                  |                     | p=0.5                  |                     | =0.3                   |                                   |
| No school/primary                          | 30 (04-84)          | reference              | 56 (31-78)          | reference              | 68 (34-90)          | reference              | ..                                |
| Secondary                                  | 65 (54-75)          | 4.28 (0.87, 21.0)      | 69 (59-78)          | 1.78 (0.64, 4.93)      | 67 (53-78)          | 0.92 (0.26, 3.28)      | ..                                |
| Tertiary                                   | 57 (43-70)          | 3.03 (0.59, 15.5)      | 76 (64-84)          | 2.46 (0.85, 7.07)      | 71 (57-81)          | 1.11 (0.30, 4.07)      | ..                                |
| <b>Income, SFr</b>                         |                     | p=0.5                  |                     | p=0.7                  |                     | p=0.3                  |                                   |
| No Income                                  | 80 (39-96)          | 2.38 (0.47, 12.1)      | 86 (48-98)          | 3.48 (0.68, 17.8)      | 60 (13-94)          | 0.9 (0.17, 4.83)       | ..                                |
| <4500                                      | 62 (50-73)          | reference              | 64 (55-72)          | reference              | 63 (51-73)          | reference              | ..                                |
| 4500-6000                                  | 56 (35-75)          | 0.78 (0.30, 2.04)      | 64 (43-80)          | 1.00 (0.41, 2.43)      | 67 (44-84)          | 1.19 (0.44, 3.22)      | ..                                |
| >6000                                      | 51 (26-76)          | 0.63 (0.20, 1.94)      | 91 (75-97)          | 5.69 (1.69, 19.2)      | 93 (75-98)          | 7.84 (1.88, 32.8)      | ..                                |
| <b>Marital Status</b>                      |                     | p=0.7                  |                     | p=0.2                  |                     | p=0.9                  |                                   |
| Single                                     | 63 (51-74)          | 1.05 (0.46, 2.41)      | 73 (63-81)          | 1.48 (0.73, 2.96)      | 71 (60-80)          | 2.57 (0.87, 7.54)      | ..                                |
| Married                                    | 62 (45-76)          | reference              | 64 (51-76)          | reference              | 49 (24-74)          | reference              | ..                                |
| Widowed                                    | 29 (0-80)           | 0.26 (0.02, 3.21)      | 76 (35-100)         | 1.74 (0.17, 17.5)      | 45 (0-100)          | 0.86 (0.04, 16.6)      | ..                                |
| Divorced                                   | 56 (35-75)          | 0.78 (0.27, 2.26)      | 71 (51-86)          | 1.26 (0.43, 3.64)      | 63 (21-92)          | 1.81 (0.35, 9.35)      | ..                                |
| <b>Age first sexual intercourse, years</b> |                     | p=0.4                  |                     | p=0.014                |                     | p<0.001                |                                   |
| Median (IQR) <sup>b</sup>                  | 17 (15-18)          | 0.95 (0.84, 1.06)      | 16 (15-18)          | 0.86 (0.76, 0.97)      | 16 (15-18)          | 0.76 (0.64, 0.89)      | ..                                |
| <b>Sex partners 12m</b>                    |                     | p=0.3                  |                     | p=0.3                  |                     | p<0.001                | p=0.026                           |
| 1                                          | 61 (51-71)          | reference              | 68 (60-75)          | reference              | 66 (54-76)          | reference              | reference                         |
| 2-4                                        | 70 (48-86)          | 1.47 (0.55, 3.95)      | 80 (63-91)          | 1.92 (0.77, 4.80)      | 79 (60-91)          | 2 (0.73, 5.52)         | 1.79 (1.01, 3.17)                 |
| 5+                                         | 87 (31-99)          | 4.32 (0.50, 37.3)      | 83 (27-99)          | 2.37 (0.29, 19.5)      | 100                 | -                      | 4.65 (1.02, 21.1)                 |
| <b>Condom use last intercourse</b>         |                     | p=0.4                  |                     | p=0.9                  |                     | p=0.8                  |                                   |
| Used                                       | 61 (50-70)          | reference              | 70 (62-77)          | reference              | 68 (58-77)          | reference              | ..                                |
| Not used                                   | 70 (52-83)          | 1.50 (0.63, 3.58)      | 70 (56-81)          | 0.99 (0.49, 2.03)      | 70 (51-84)          | 1.12 (0.46, 2.72)      | ..                                |
| <b>Alcohol</b>                             |                     | p >0.9                 |                     | p=0.4                  |                     | p<0.001                | ..                                |
| No use                                     | 66 (36-88)          | reference              | 55 (32-76)          | reference              | 95 (83-99)          | reference              | ..                                |
| Daily                                      | 61 (33-83)          | 0.79 (0.16, 3.77)      | 64 (35-85)          | 1.44 (0.35, 5.89)      | 46 (11-87)          | 0.05 (0.01, 0.31)      | ..                                |
| Weekly                                     | 60 (48-71)          | 0.75 (0.22, 2.60)      | 72 (63-80)          | 2.13 (0.78, 5.80)      | 71 (60-81)          | 0.13 (0.03, 0.52)      | ..                                |
| Monthly                                    | 62 (44-77)          | 0.82 (0.22, 3.12)      | 74 (60-84)          | 2.30 (0.78, 6.81)      | 54 (36-71)          | 0.06 (0.01, 0.27)      | ..                                |
| <b>Tobacco</b>                             |                     | p=0.4                  |                     | p=0.6                  |                     | p= 0.5                 | ..                                |
| Non-smoker                                 | 60 (47-71)          | reference              | 68 (58-77)          | reference              | 67 (54-78)          | reference              | ..                                |
| Casual smoker                              | 48 (23-73)          | 0.61 (0.20, 1.86)      | 67 (49-81)          | 0.41, 2.21             | 80 (50-94)          | 1.96 (0.58, 6.63)      | ..                                |
| Daily smoker                               | 66 (51-78)          | 1.27 (0.58, 2.76)      | 75 (63-85)          | 0.68, 2.97             | 68 (53-80)          | 1.04 (0.46, 2.35)      | ..                                |
| <b>Cannabis<sup>c</sup></b>                |                     | p=0.11                 |                     | p=0.001                |                     | p<0.001                | ..                                |
| No use                                     | 50 (37-63)          | reference              | 53 (40-66)          | reference              | 51 (37-64)          | reference              | ..                                |
| Any use                                    | 70 (57-80)          | 2.31 (1.06, 5.06)      | 78 (69-84)          | 3.04 (1.54, 5.97)      | 82 (71-90)          | 4.46 (1.92, 10.4)      | ..                                |
| <b>Other illicit drugs<sup>d</sup></b>     |                     | p=0.3                  |                     | p=0.13                 |                     | p=0.2                  | ..                                |
| No use                                     | 59 (49-68)          | reference              | 67 (59-74)          | reference              | 65 (55-74)          | reference              | ..                                |
| Any use                                    | 69 (50-83)          | 1.55 (0.65, 3.69)      | 81 (63-92)          | 2.09 (0.79, 5.53)      | 80 (58-93)          | 2.21 (0.71, 6.89)      | ..                                |

a. Multivariable model includes age, and number of sex partners; p value from Wald test;

---

b. Median age of the proportion tested for HIV;

c. In 2007 questions about drugs were only asked to people between 15 to 69 years;

d. Combines use of ecstasy, cocaine, or heroin and combines categories of use more than 12 months ago and use within last 12 months.

Abbreviations: CI, confidence interval; IQR, interquartile range; m, months; OR, odds ratio; SFr, Swiss Francs; yrs, years; ..., variable not included in multivariable model.
