# Supplementary material for: Condom use and HIV testing among adults in Switzerland: repeated national cross-sectional surveys 2007, 2012, and 2017
Source: bioRxiv or medRxiv preprint supplement (doi:10.1101/2022.12.05.22283096), 2022-12-06
Supplement: Supplementary file [file media-2.pdf]

STROBE Statement—Checklist of items that should be included in reports of ***cross-sectional studies***

|                           | Item No | Recommendation                                                                                                                                                                       | Location where item is reported |
|---------------------------|---------|--------------------------------------------------------------------------------------------------------------------------------------------------------------------------------------|---------------------------------|
| <b>Title and abstract</b> | 1       | (a) Indicate the study's design with a commonly used term in the title or the abstract                                                                                               | Page 1                          |
|                           |         | (b) Provide in the abstract an informative and balanced summary of what was done and what was found                                                                                  | Page 2                          |
| <b>Introduction</b>       |         |                                                                                                                                                                                      |                                 |
| Background/rationale      | 2       | Explain the scientific background and rationale for the investigation being reported                                                                                                 | Page 4                          |
| Objectives                | 3       | State specific objectives, including any prespecified hypotheses                                                                                                                     | Page 4-5                        |
| <b>Methods</b>            |         |                                                                                                                                                                                      |                                 |
| Study design              | 4       | Present key elements of study design early in the paper                                                                                                                              | Page 5                          |
| Setting                   | 5       | Describe the setting, locations, and relevant dates, including periods of recruitment, exposure, follow-up, and data collection                                                      | Page 5                          |
| Participants              | 6       | (a) Give the eligibility criteria, and the sources and methods of selection of participants                                                                                          | Page 5<br>Table S1              |
| Variables                 | 7       | Clearly define all outcomes, exposures, predictors, potential confounders, and effect modifiers. Give diagnostic criteria, if applicable                                             | Page 6                          |
| Data sources/measurement  | 8*      | For each variable of interest, give sources of data and details of methods of assessment (measurement). Describe comparability of assessment methods if there is more than one group | Page 6                          |
| Bias                      | 9       | Describe any efforts to address potential sources of bias                                                                                                                            | Page 5                          |
| Study size                | 10      | Explain how the study size was arrived at                                                                                                                                            | Page 5                          |
| Quantitative variables    | 11      | Explain how quantitative variables were handled in the analyses. If applicable, describe which groupings were chosen and why                                                         | Page 6-7                        |
| Statistical methods       | 12      | (a) Describe all statistical methods, including those used to control for confounding                                                                                                | Page 6-7                        |
|                           |         | (b) Describe any methods used to examine subgroups and interactions                                                                                                                  | Page 6-7                        |
|                           |         | (c) Explain how missing data were addressed                                                                                                                                          | Page 7                          |
|                           |         | (d) If applicable, describe analytical methods taking account of sampling strategy                                                                                                   | Page 6                          |

|                          |     |                                                                                                                                                                                                              |                          |
|--------------------------|-----|--------------------------------------------------------------------------------------------------------------------------------------------------------------------------------------------------------------|--------------------------|
|                          |     | (e) Describe any sensitivity analyses                                                                                                                                                                        | Not Applicable           |
| <b>Results</b>           |     |                                                                                                                                                                                                              |                          |
| Participants             | 13* | (a) Report numbers of individuals at each stage of study—eg numbers potentially eligible, examined for eligibility, confirmed eligible, included in the study, completing follow-up, and analysed            | Page 7-8                 |
|                          |     | (b) Give reasons for non-participation at each stage                                                                                                                                                         | Page 8<br>Table S1       |
|                          |     | (c) Consider use of a flow diagram                                                                                                                                                                           | Page 8                   |
| Descriptive data         | 14* | (a) Give characteristics of study participants (eg demographic, clinical, social) and information on exposures and potential confounders                                                                     | Page 8-19                |
|                          |     | (b) Indicate number of participants with missing data for each variable of interest                                                                                                                          | Supp tables              |
| Outcome data             | 15* | Report numbers of outcome events or summary measures                                                                                                                                                         |                          |
| Main results             | 16  | (a) Give unadjusted estimates and, if applicable, confounder-adjusted estimates and their precision (eg, 95% confidence interval). Make clear which confounders were adjusted for and why they were included | Table 2-5<br>Supp tables |
|                          |     | (b) Report category boundaries when continuous variables were categorized                                                                                                                                    | Table 2-5                |
|                          |     | (c) If relevant, consider translating estimates of relative risk into absolute risk for a meaningful time period                                                                                             | Not applicable           |
| Other analyses           | 17  | Report other analyses done—eg analyses of subgroups and interactions, and sensitivity analyses                                                                                                               | Not applicable           |
| <b>Discussion</b>        |     |                                                                                                                                                                                                              |                          |
| Key results              | 18  | Summarise key results with reference to study objectives                                                                                                                                                     | Page 19-20               |
| Limitations              | 19  | Discuss limitations of the study, taking into account sources of potential bias or imprecision. Discuss both direction and magnitude of any potential bias                                                   | Page 20                  |
| Interpretation           | 20  | Give a cautious overall interpretation of results considering objectives, limitations, multiplicity of analyses, results from similar studies, and other relevant evidence                                   | Page 21                  |
| Generalisability         | 21  | Discuss the generalisability (external validity) of the study results                                                                                                                                        | Page 22-23               |
| <b>Other information</b> |     |                                                                                                                                                                                                              |                          |
| Funding                  | 22  | Give the source of funding and the role of the funders for the present study and, if applicable, for the original study on which the present article is based                                                | Page 24                  |
